# Supplementary material
Source: Royal Society of Chemistry journal article supplement (doi:10.1039/d6qi00387g)
Supplement: d6qi00387g1.pdf [file d6qi00387g1.pdf]

## Supporting Information

### **Stable Oxygen Vacancies Engineered via Microenvironment-Regulated Diglyceryl Ether Decomposition for Solar-Driven Clean Water Generation**

Chao Wang,<sup>a,b</sup> José M. Fraile,<sup>b</sup> Weian Wang,<sup>c</sup> Leichen Wang,<sup>a</sup> Baowei Shen,<sup>a</sup> Wei Ji,<sup>a</sup> Su Jing,<sup>\*a</sup> Elisabet Pires,<sup>\*b</sup> Jian Qu,<sup>d</sup> Chang Liu,<sup>e</sup> José A. Mayoral,<sup>b</sup> Wenzhong Yang<sup>a</sup>

<sup>a</sup> School of Chemistry and Molecular Engineering, Nanjing Tech University, Nanjing 211816, China.

<sup>b</sup> Instituto de Síntesis Química y Catálisis Homogénea, CSIC-Universidad de Zaragoza, Pedro Cerbuna 12, E-50009 Zaragoza, Spain.

<sup>c</sup> School of Chemistry and Chemical Engineering, Southeast University, Nanjing 210096, China.

<sup>d</sup> School of Materials Science and Engineering, Yancheng Institute of Technology, Yancheng 224051, China

<sup>e</sup> State Key Laboratory of Materials-Oriented Chemical Engineering, College of Chemical Engineering, Nanjing Tech University, Nanjing 211816, China

## 1. Calculation of the Evaporation Rate and Evaporation Efficiency<sup>1,2</sup>

The evaporation rate ( $\dot{m}$ ) of the samples was calculated by the following Equation 1:

$$\dot{m} = dm / (A dt) \quad (1)$$

Where  $m$  is the mass change of the entire evaporator,  $A$  is the irradiated evaporator area, and  $t$  is the irradiation time.

The evaporation efficiency ( $\eta$ ) can be calculated by the following Equation 2.

$$\eta = \dot{m} h_{lv} / C_{opt} P_0 \quad (2)$$

Where  $\dot{m}$  was the mass flux ( $\dot{m} = m_{\text{Light}} - m_{\text{Dark}}$ ) ( $\text{kg m}^{-2} \text{h}^{-1}$ ),  $C_{opt}$  is the multiple of 1 sun illumination density,  $P_0$  is the solar intensity, and  $h_{lv}$  is the water evaporation enthalpy. According to the energy conversion principle, water evaporation rates can be expressed using the equations.

$h_{lv}$  was calculated using Equations 3 and 4.

$$h_{lv} = C_p (T - T_0) + \lambda_{lv} \quad (3)$$

$$U_{in} = \nabla H_0 m_0 = \nabla H_1 m_1 \quad (4)$$

The energy input ( $U_{in}$ ) in the darkness was equal. Among them,  $\nabla H_0$  ( $2444 \text{ J g}^{-1}$ ) and  $m_0$  ( $0.098 \text{ kg} \cdot \text{m}^{-2} \cdot \text{h}^{-1}$ ) represent the enthalpy and rate of evaporation of bulk water in the dark, while  $\nabla H_1$  and  $m_1$  ( $0.191 \text{ kg m}^{-2} \text{h}^{-1}$ ) represented the equivalent enthalpy of evaporation ( $\lambda_{lv}$ ) and vaporization rate of BST/LFICS in the dark.  $C_p$  is the specific heat capacity of water ( $4.2 \text{ J g}^{-1} \text{ K}^{-1}$ ),  $T_0$  is the initial temperature of water, and  $T$  is the temperature of steam.

The following assumptions were made for all calculations:

1. Steady-state evaporation conditions were achieved during the test period.
2. Heat losses to the surrounding environment (convection, conduction, radiation) were corrected for via the dark evaporation baseline.
3. The effective enthalpy  $h_{lv}$  was constant for each sample during the test.
4. The incident solar intensity was uniform and stable at  $1000 \text{ W} \cdot \text{m}^{-2}$  throughout the measurement.

A detailed example calculation for TiOC@SA-TiOC is now provided below, and all other samples follow the same stepwise calculation:

1. Net evaporation rate:  $\dot{m} = 2.61 - 0.39 = 2.22 \text{ kg} \cdot \text{m}^{-2} \cdot \text{h}^{-1}$

2. Effective enthalpy:

$$h_{LV} = C_p (T - T_0) + \nabla H_0 m_0 / m_1 = 4.2 * (373.0 - 303.5) + 0.19 * 2444 / 0.39 = 1493.87 \text{ J} \cdot \text{g}^{-1}$$

3. Efficiency:  $\eta = \dot{m} h_{lv} / C_{opt} P_0 = 2.22 * 1493.87 / 3600 * 100\% = 92.19\%$

## 2. Theoretical Simulation

Spin-polarized density functional theory (DFT) calculations were performed using the Vienna ab initio simulation package (VASP) with the projector augmented wave (PAW) method.<sup>3,4</sup> The Perdew–Burke–Ernzerhof (PBE) functional within the Dudarev +U scheme was used to describe the Ti 3*d* states, with  $U_{\text{eff}} = 4.0$  eV.<sup>5</sup> Dispersion interactions were treated using the DFT-D3 method with Becke–Johnson damping. A plane-wave cutoff energy of 450 eV was employed.<sup>6</sup> Local bulk-like defect thermodynamics were modeled using a  $2 \times 2 \times 1$  supercell of anatase TiO<sub>2</sub>, containing 16 Ti and 32 O atoms. The Brillouin zone was sampled using a  $3 \times 3 \times 3$  Monkhorst–Pack *k*-point mesh. The total-energy and force convergence criteria were set to  $10^{-4}$  eV and 0.02 eV/Å, respectively. Three representative defect models were first considered: pristine anatase (TiO<sub>2</sub>)<sub>16</sub>, the intrinsic oxygen-vacancy model (TiO<sub>2</sub>)<sub>16</sub>-O<sub>v</sub>, the isolated carbon-substituted model C-(TiO<sub>2</sub>)<sub>16</sub>, and the aromatic-carbon-associated model C<sub>10</sub>/Csp<sup>2</sup>-(TiO<sub>2</sub>)<sub>16</sub>.

The formation energies were calculated as follows:

$$E_f^{O_v} = E_{[(\text{TiO}_2)_{16} - O_v]} - E_{[(\text{TiO}_2)_{16}]} + \mu_O \quad (5)$$

$$E_f^{C@O_v} = E_{[C - (\text{TiO}_2)_{16}]} - E_{[(\text{TiO}_2)_{16} - O_v]} - \mu_C \quad (6)$$

$$E_f^{C_{10}/C_{sp^2}@3O_v} = E_{[C_{10}/C_{sp^2} - (\text{TiO}_2)_{16}]} - E_{[(\text{TiO}_2)_{16} - 3O_v]} - E_{C_{10}/C_{sp^2}} \quad (7)$$

where  $E[*]$  denotes the total energy of the corresponding supercell,  $E_{[(\text{TiO}_2)_{16}]}$ ,  $E_{[(\text{TiO}_2)_{16} - O_v]}$ ,  $E_{[(\text{TiO}_2)_{16} - 3O_v]}$ ,  $E_{[C - (\text{TiO}_2)_{16}]}$ ,  $E_{[(\text{TiO}_2)_{16} - 3O_v]}$ ,  $E_{[C_{10}/C_{sp^2} - (\text{TiO}_2)_{16}]}$  and  $E_{C_{10}/C_{sp^2}}$  are total energies of the corresponding structure, the  $\mu_O$  and  $\mu_C$  denote as the chemical potential of the oxygen and carbon, respectively.

It should be noted that this DFT model was used to compare the relative thermodynamic stability of local OV-containing defect motifs in bulk-like anatase TiO<sub>2</sub>. It does not explicitly describe the polymeric Ti(**D100**)<sub>n</sub> precursor, mesoscale porosity, surface reconstruction, oxygen transport, or the decomposition kinetics of **D100** during calcination.

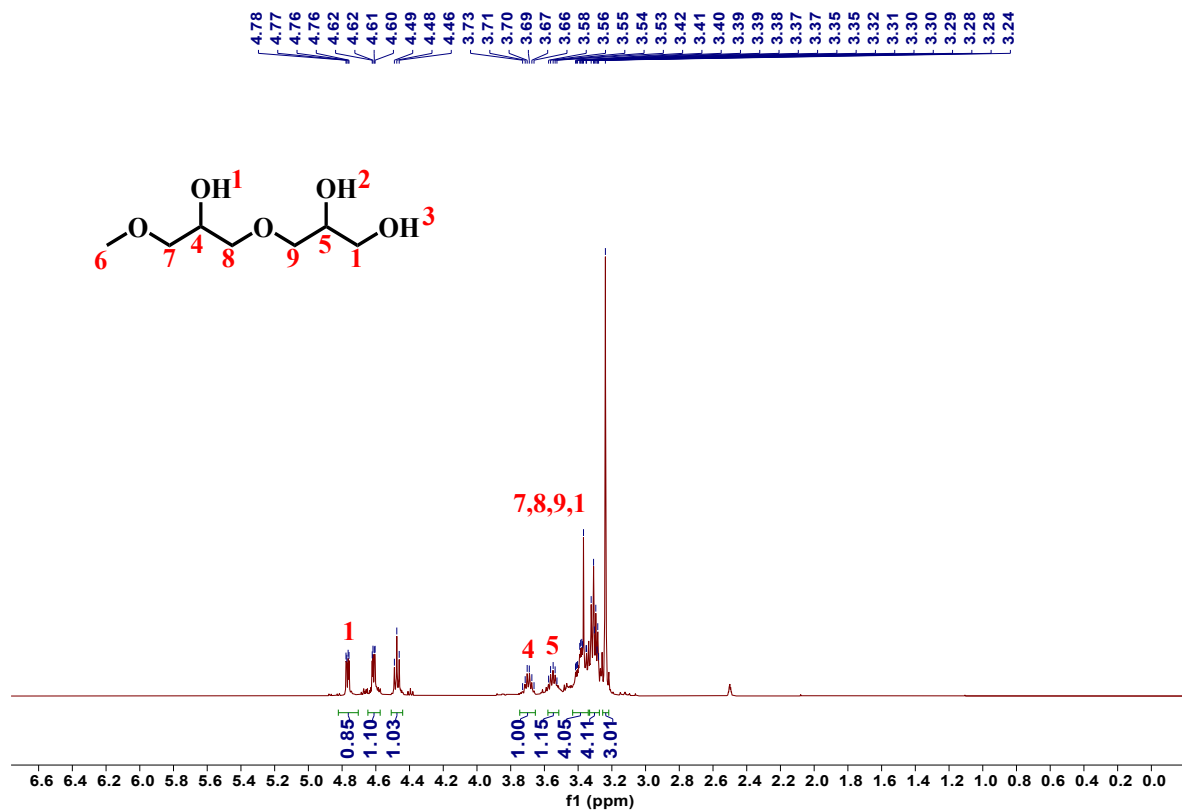

Fig. S1  $^1\text{H}$  NMR spectrum of **D100** in DMSO- $d_6$  solution.

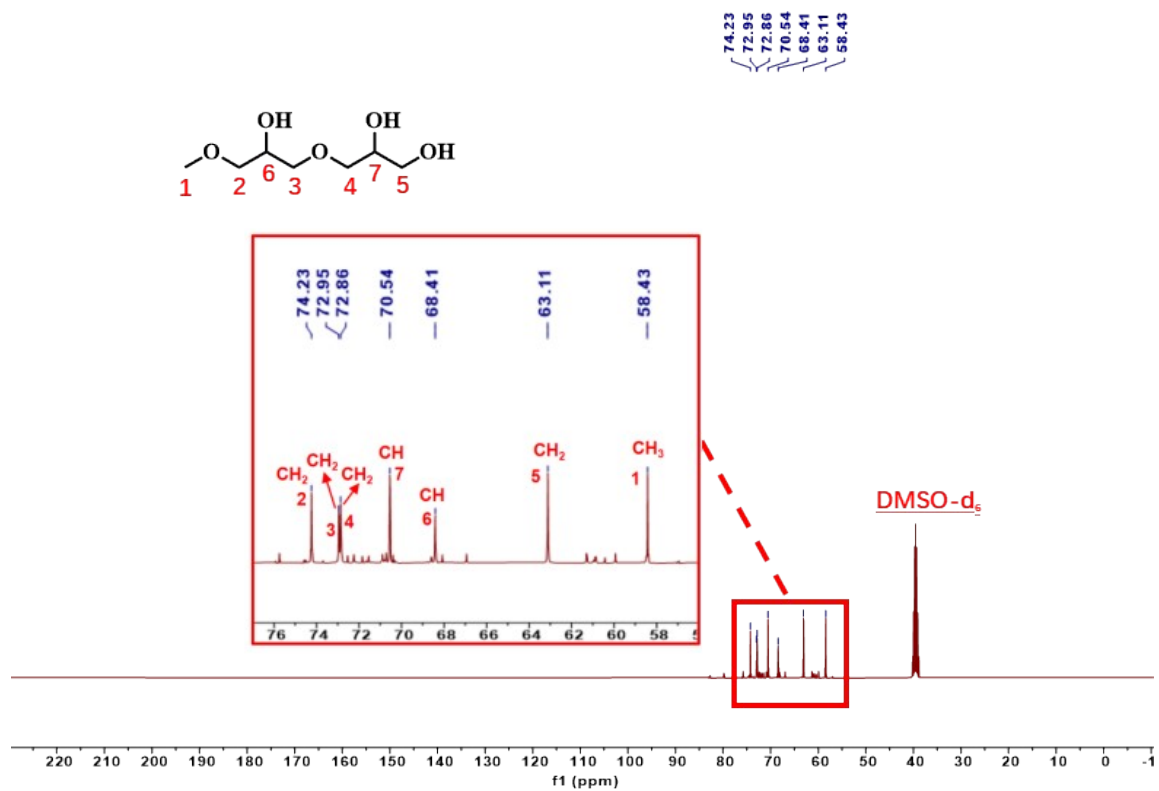

Fig. S2  $^{13}\text{C}$  NMR spectrum of **D100** in DMSO- $d_6$  solution.

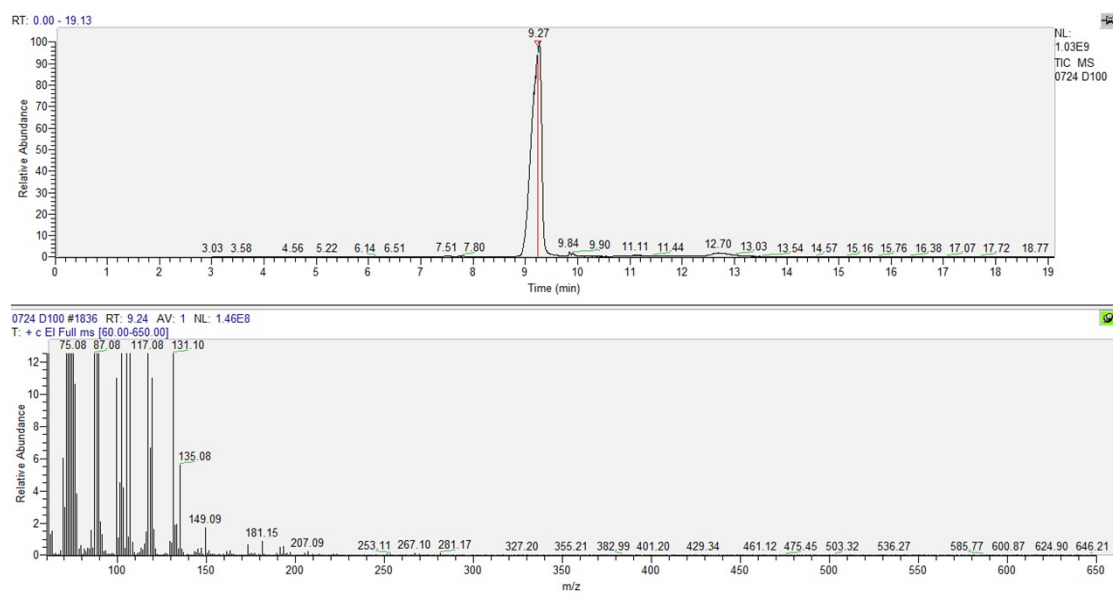

**Fig.S3** GC-MS diagram of **D100**.

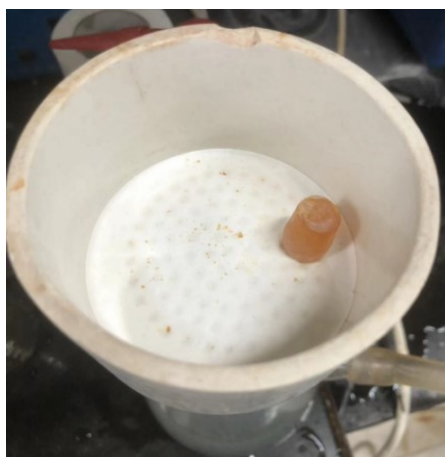

**Fig. S4** Digital photo of hydrogel precursor  $Ti(D100)_2$ .

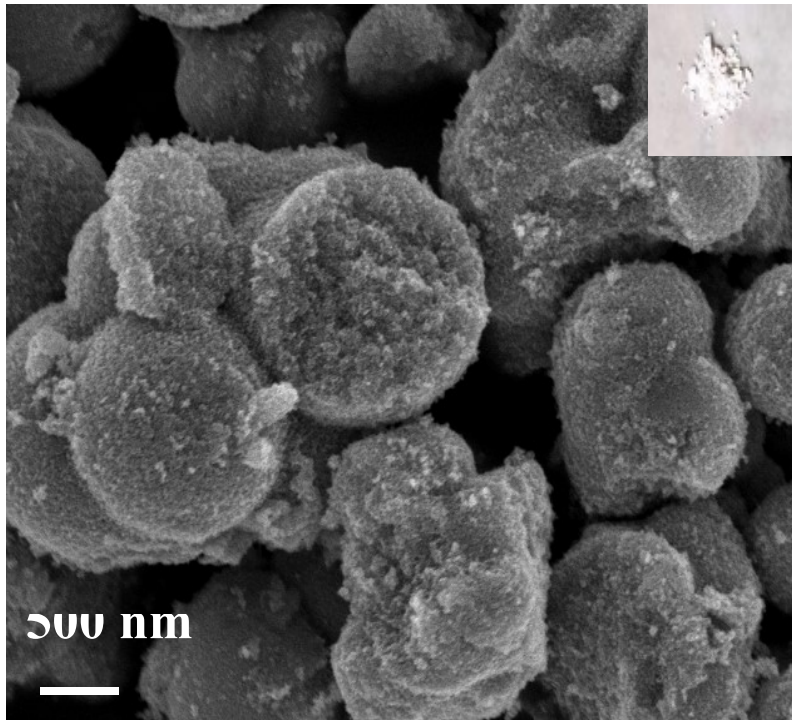

**Fig. S5** FE-SEM image of TiOC-0 (inset: an optical image of the corresponding particles).

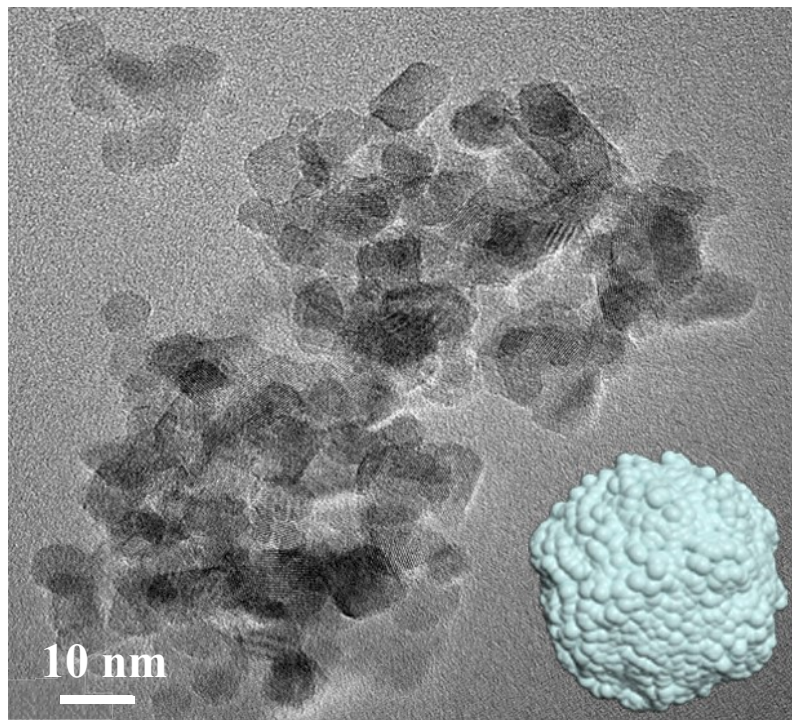

**Fig. S6** TEM image of TiOC-0.

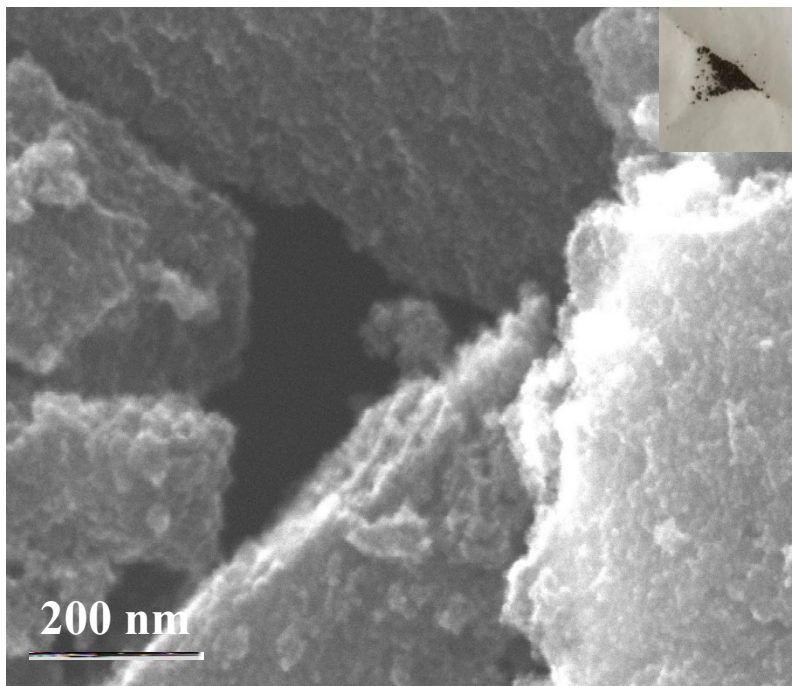

**Fig. S7** FE-SEM images of TiOC-1 (inset: an optical image of the corresponding particles).

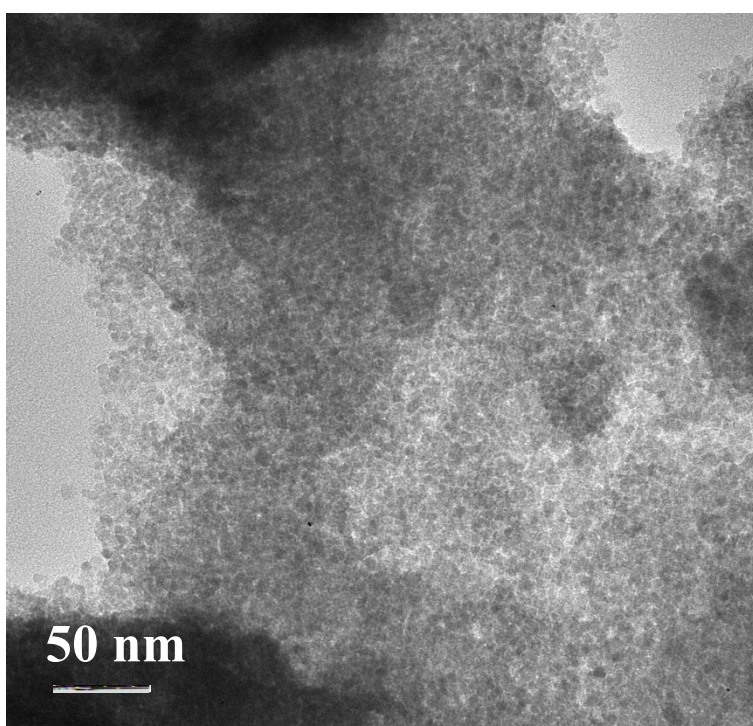

**Fig. S8** TEM image of TiOC-1.

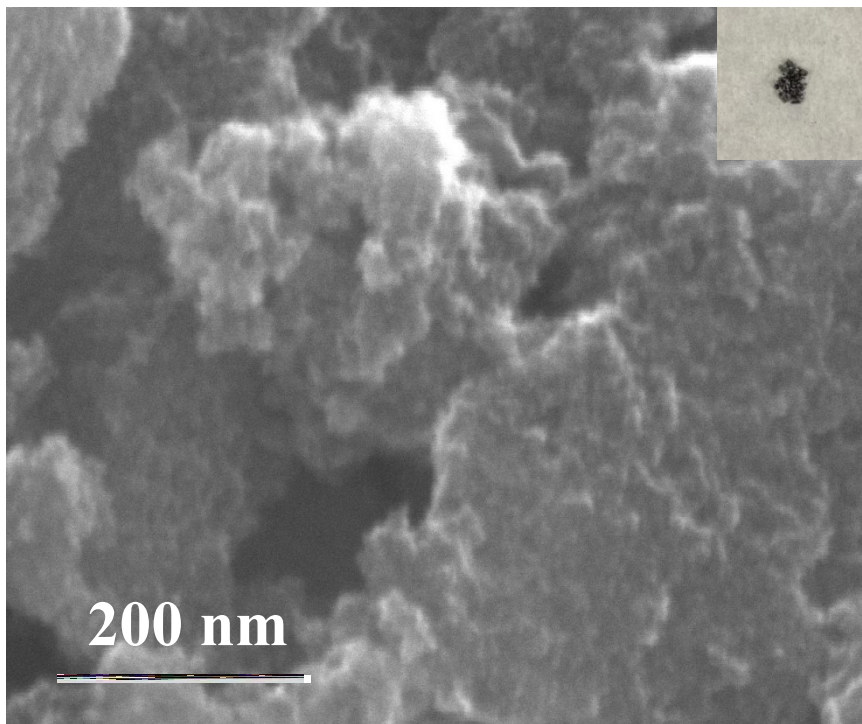

**Fig. S9** FE-SEM image of TiOC-3 (inset: an optical image of the corresponding particles).

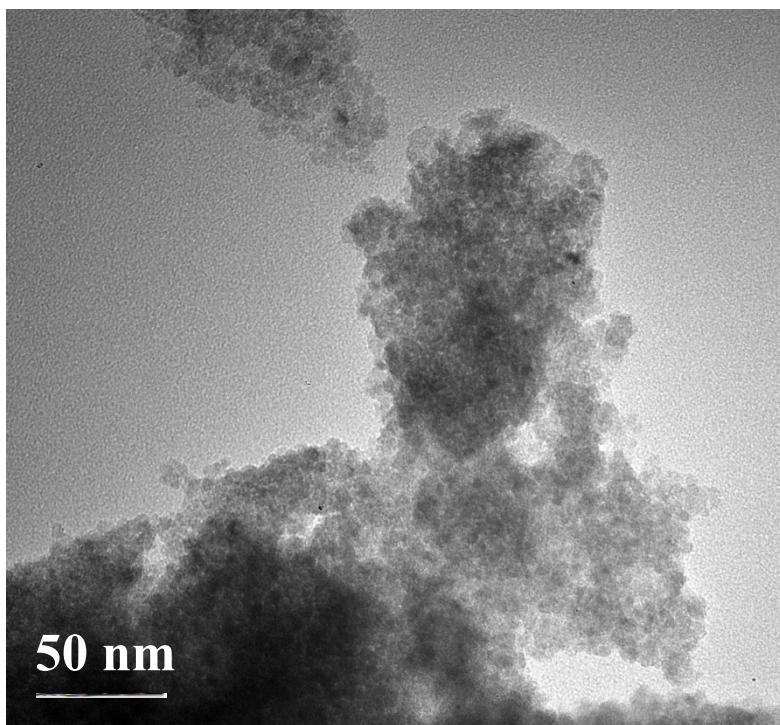

**Fig. S10** TEM image of TiOC-3.

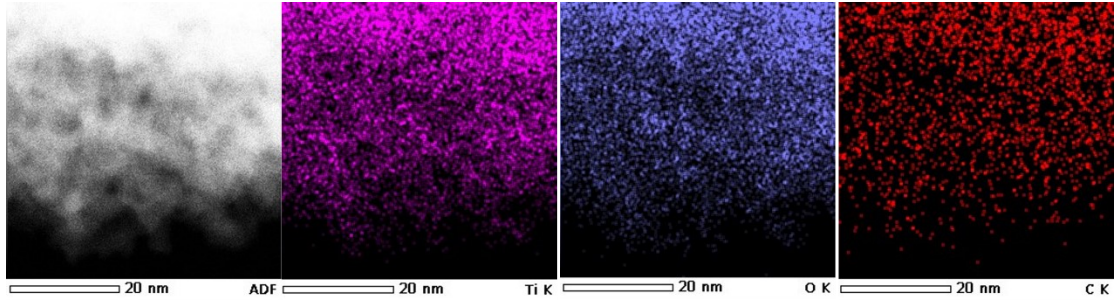

Fig. S11 HAADF-STEM image and element mappings of TiOC-2.

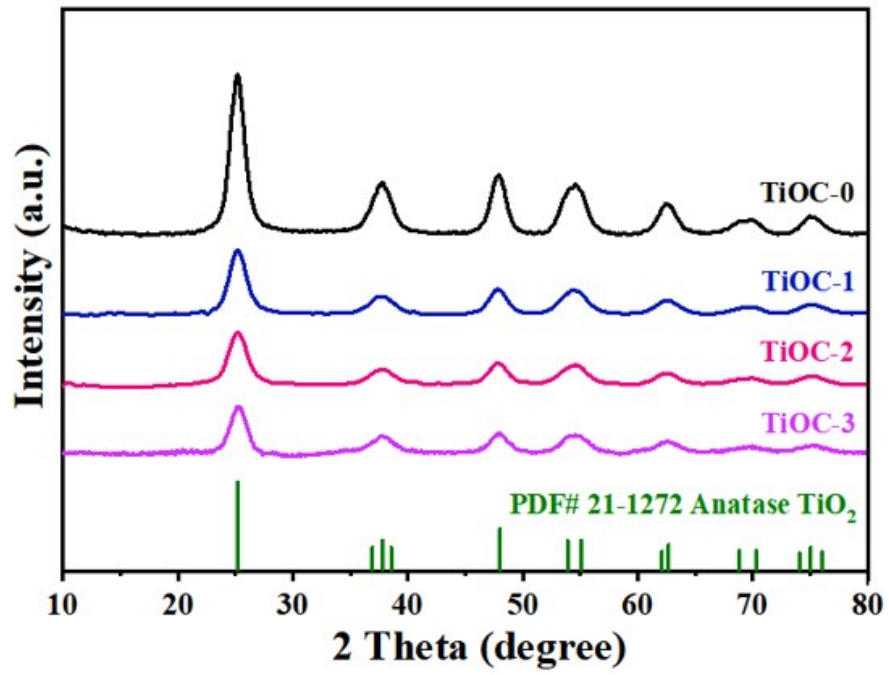

Fig. S12 XRD patterns of TiOC-n .

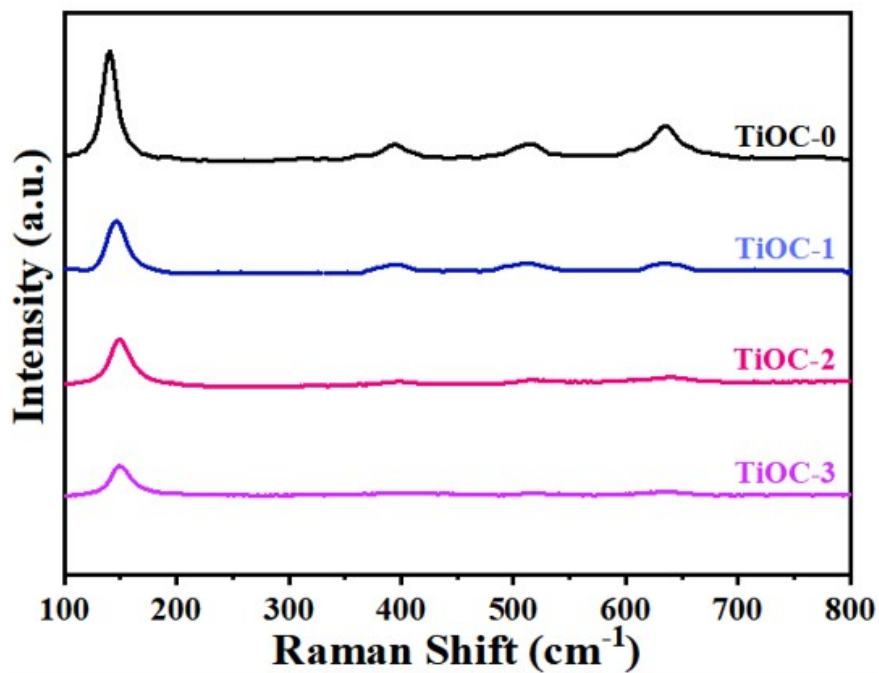

Fig. S13 Raman spectra of TiOC-n .

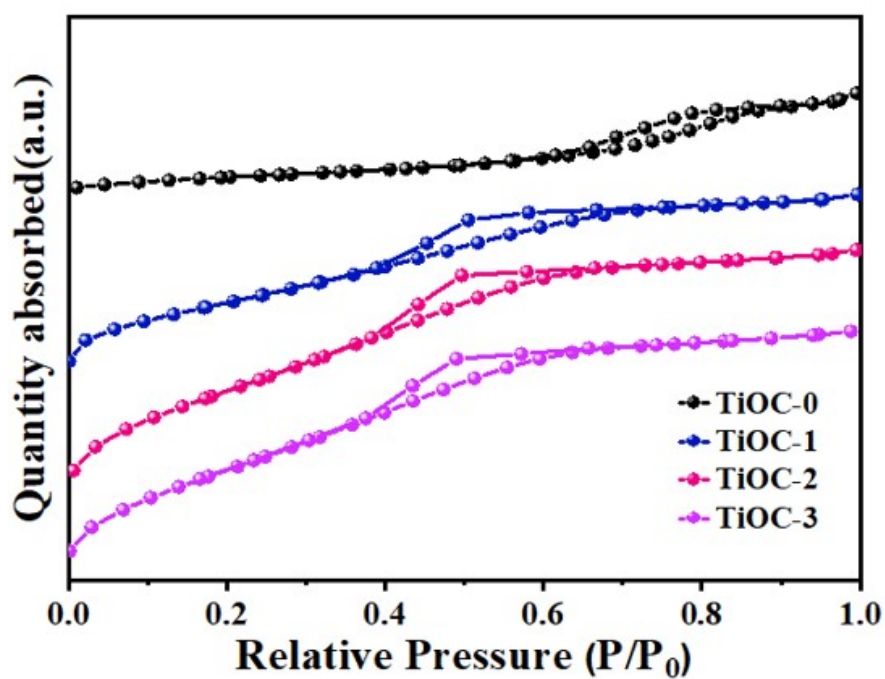

Fig. S14 N<sub>2</sub> adsorption-desorption isotherms of TiOC-n .

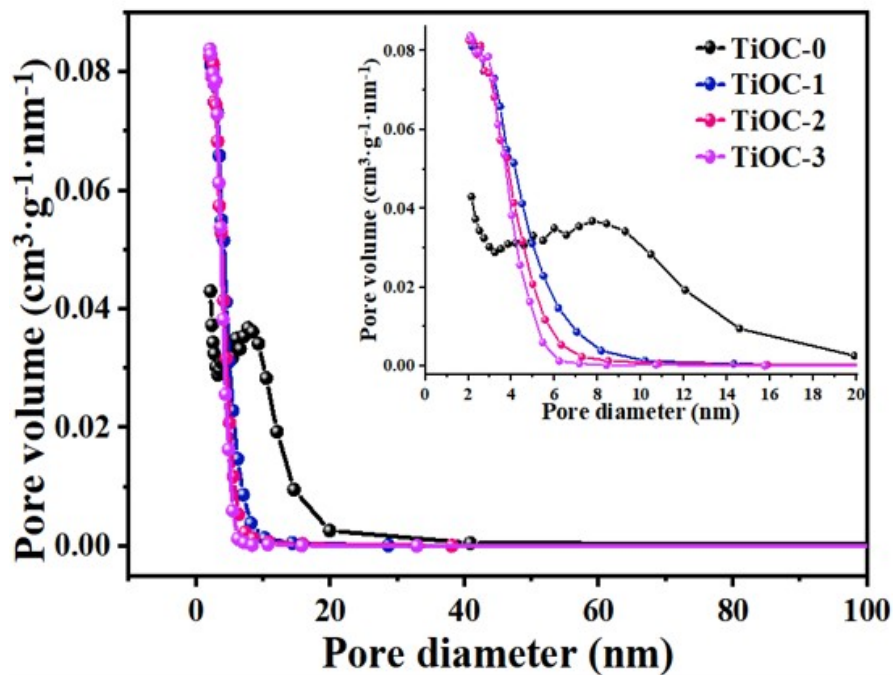

Fig. S15 Pore diameter distribution of TiOC-n .

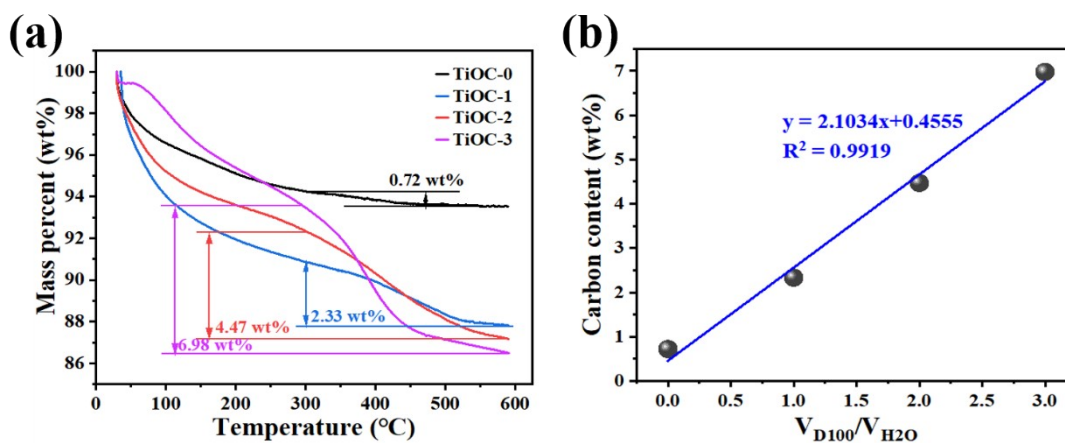

Fig. S16 (a) TG curves of various TiOC-n and (b) their fitting result based on TGA.

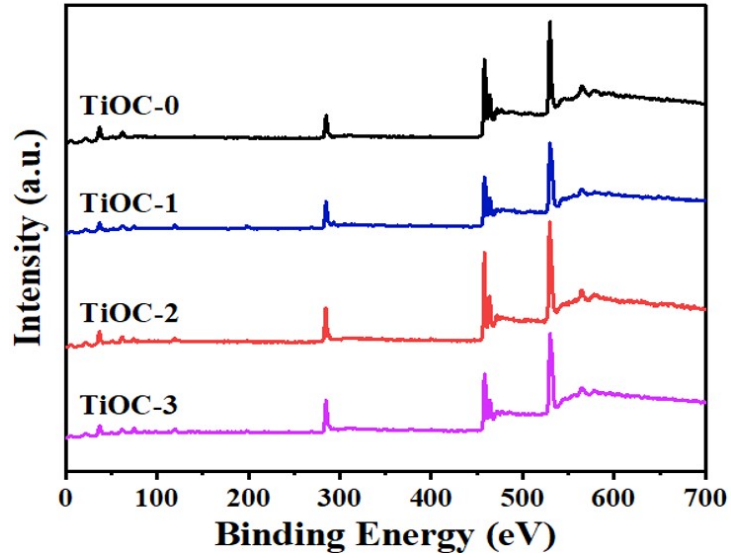

Fig. S17 XPS spectra of TiOC-n.

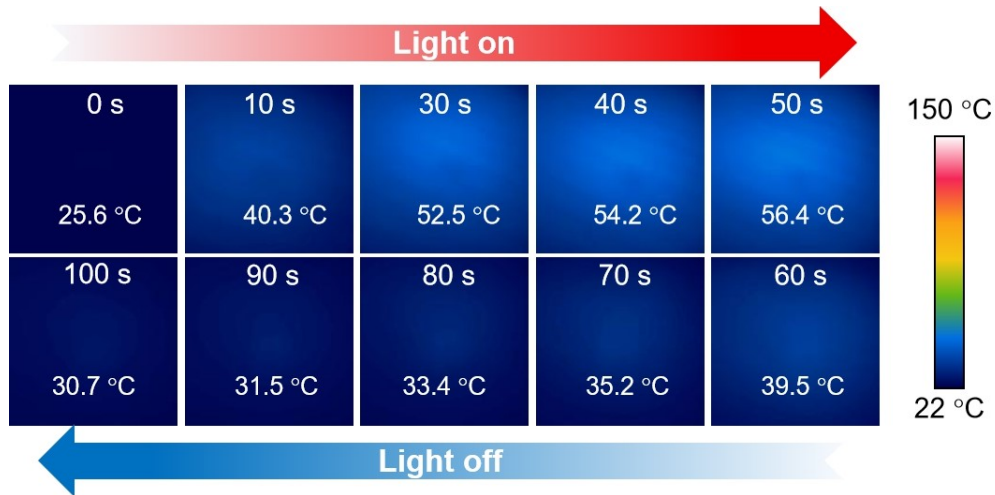

Fig. S18 IR camera images of TiOC-0 under on/off  $4 \text{ kW m}^{-2}$  illumination.

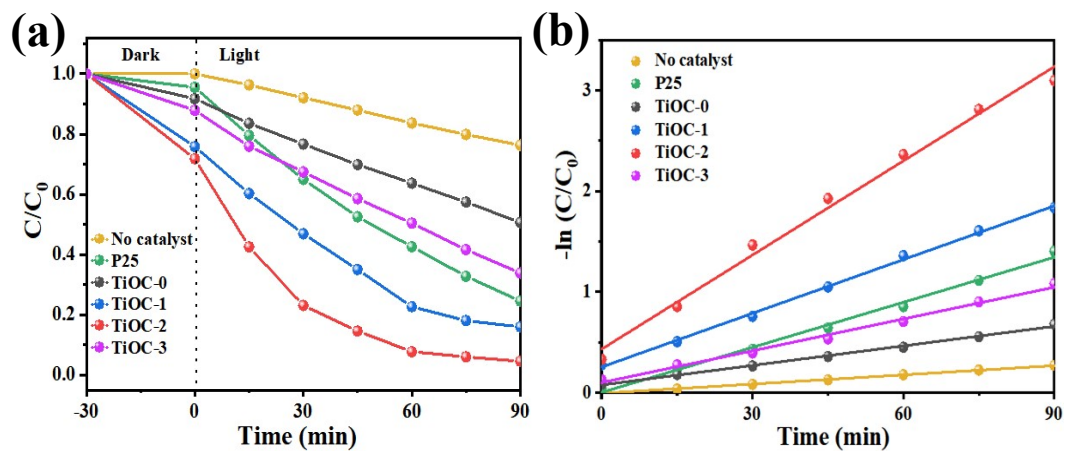

Fig. S19 Photocatalytic MB degradation performance of P25 and TiOC-n under  $1 \text{ kW m}^{-2}$  illumination.

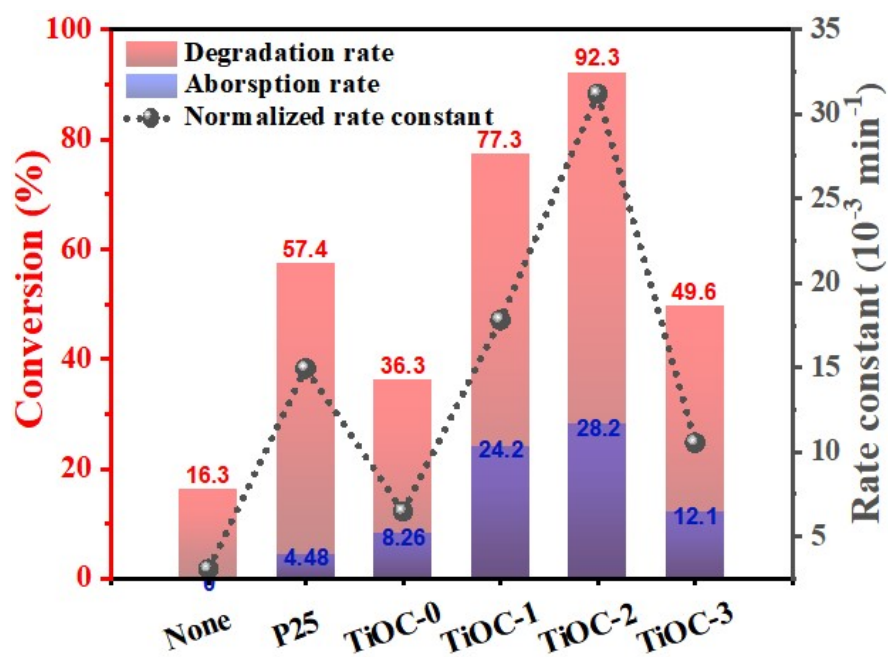

Fig. S20 Photocatalytic MB degradation performance of P25 and TiOC-n under  $1 \text{ kW m}^{-2}$  illumination.

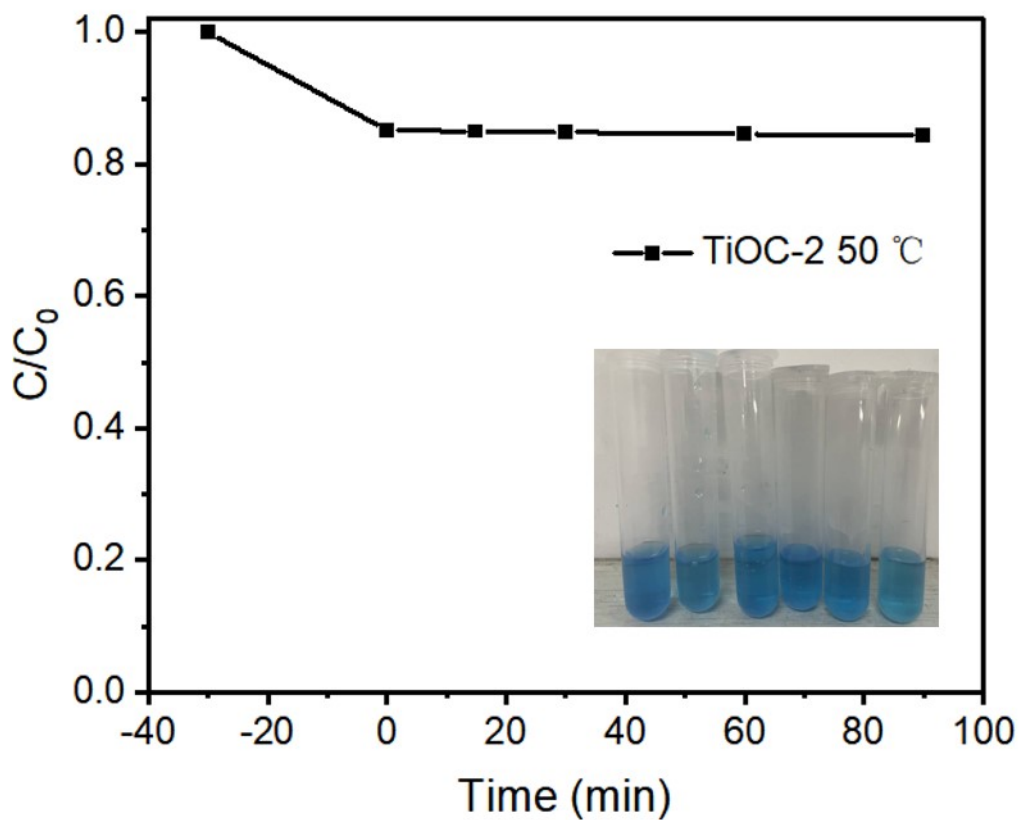

Fig. S21 MB degradation performance of TiOC-2 at  $50 \text{ }^\circ\text{C}$  in dark.

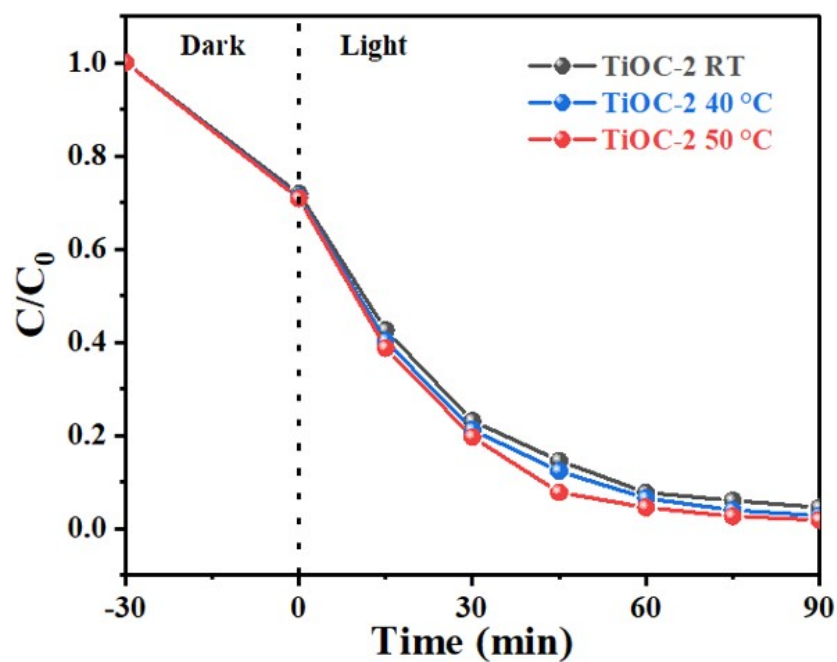

**Fig. S22** Photocatalytic MB degradation performance of TiOC-2 at various temperature under  $1 \text{ kW m}^{-2}$  illumination.

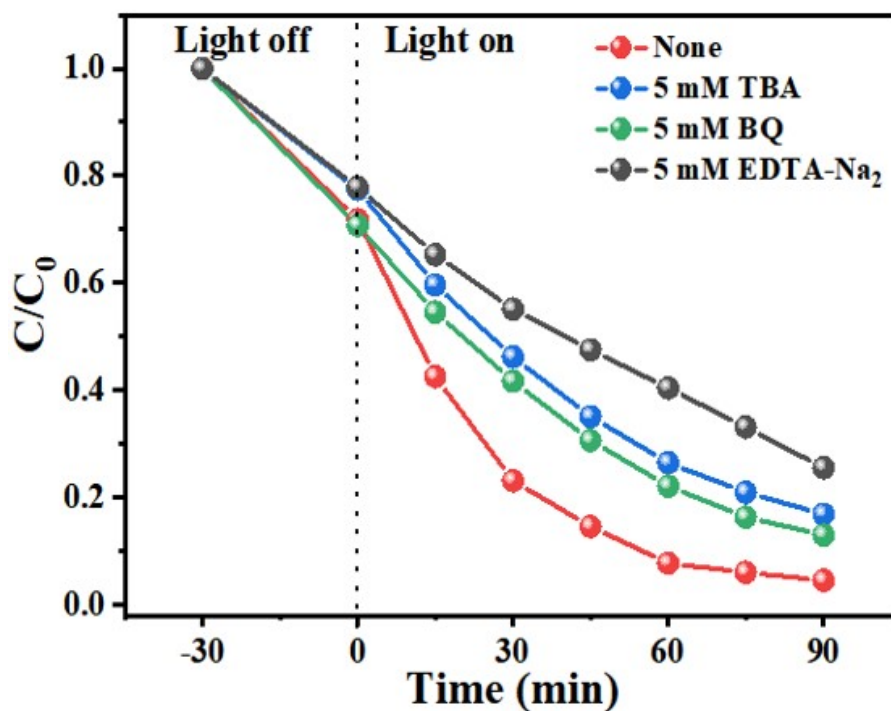

**Fig. S23** The reactive species scavenger experiments in MB photocatalytic degradation of TiOC-2 under 1 sun irradiation. The scavengers used were benzoquinone (BQ) for superoxide radicals ( $\bullet\text{O}_2^-$ ), tert-butanol (TBA) for hydroxyl radicals ( $\bullet\text{OH}$ ), and EDTA- $\text{Na}_2$  for photogenerated holes ( $\text{h}^+$ ), respectively.<sup>7, 8</sup>

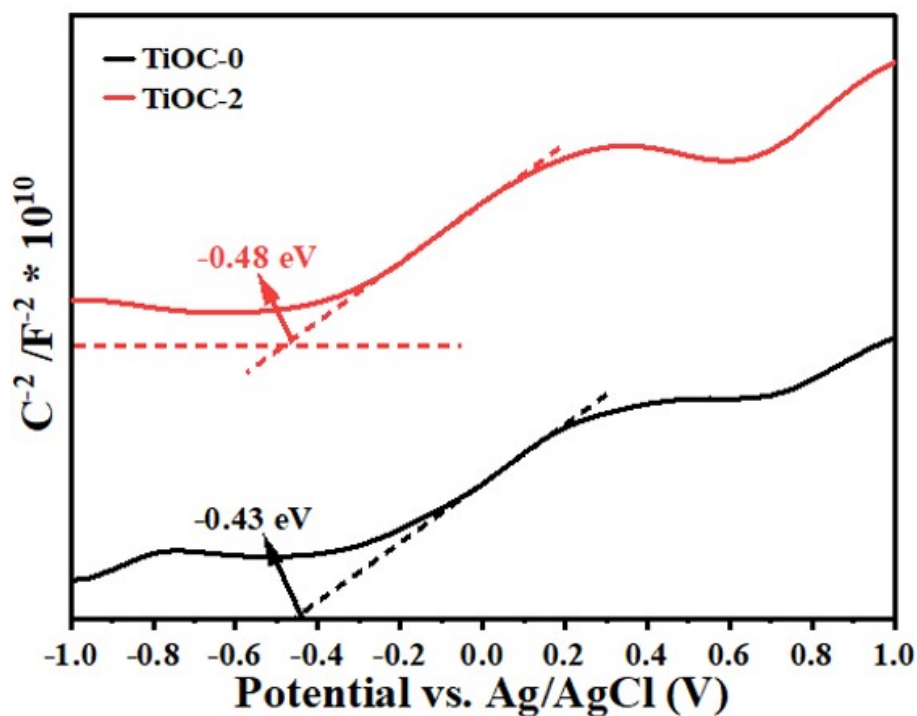

Fig. S24 Mott-Schottky diagrams of TiOC-0 and TiOC-2.

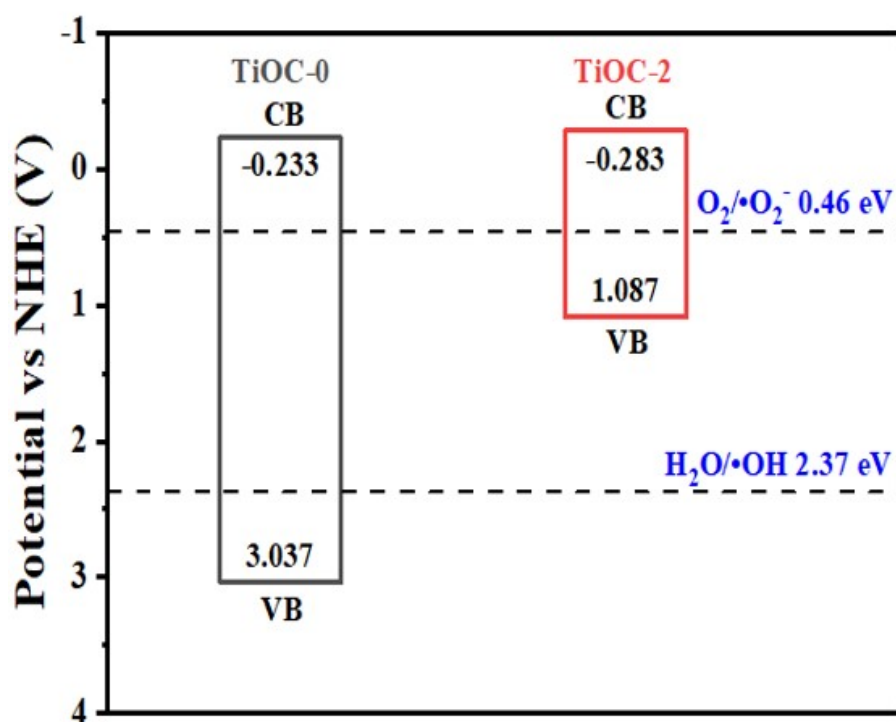

Fig. S25 Electronic band structures of TiOC-0 and TiOC-2. The flat-band potentials were determined vs. Ag/AgCl. The conduction band ( $E_{CB}$ ) position was calculated vs. NHE according to the equation  $E_{CB} = E_{(Ag/AgCl)} + 0.197$  V, the valence band ( $E_{VB}$ ) position was calculated according to the equation  $E_g = E_{VB} - E_{CB}$ .<sup>9,10</sup>

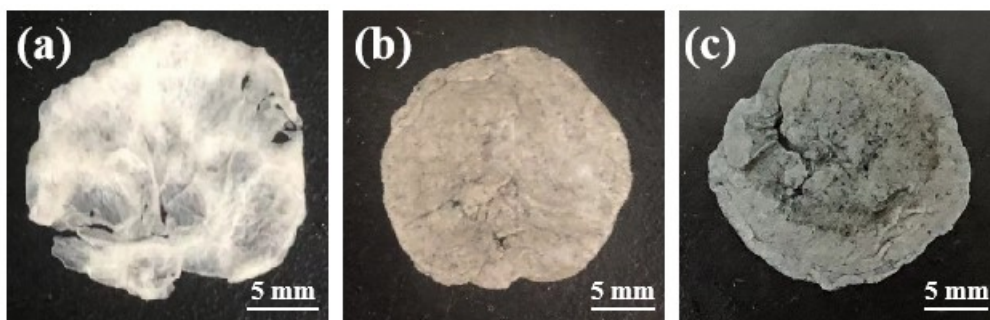

**Fig. S26** Top digital photographs of as-prepared (a) SA, (b) SA-TiOC and (c) TiOC@SA-TiOC aerogels.

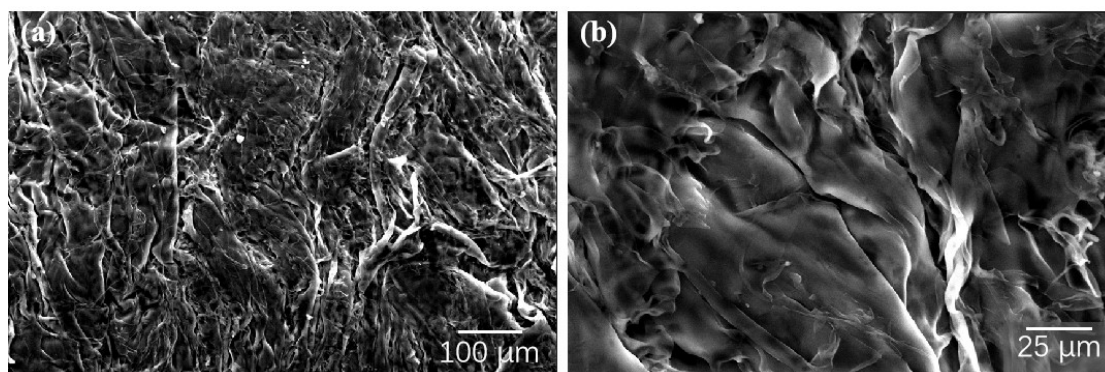

**Fig. S27** FE-SEM image of SA aerogel.

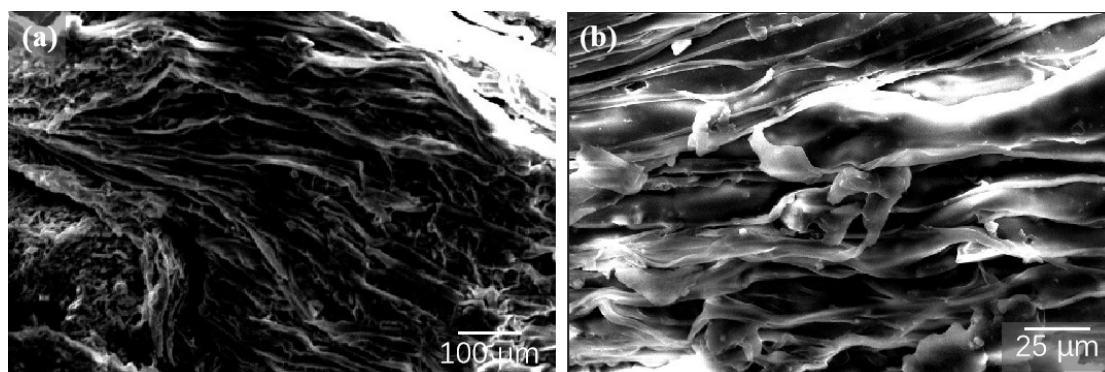

**Fig. S28** FE-SEM image of SA-TiOC aerogel.

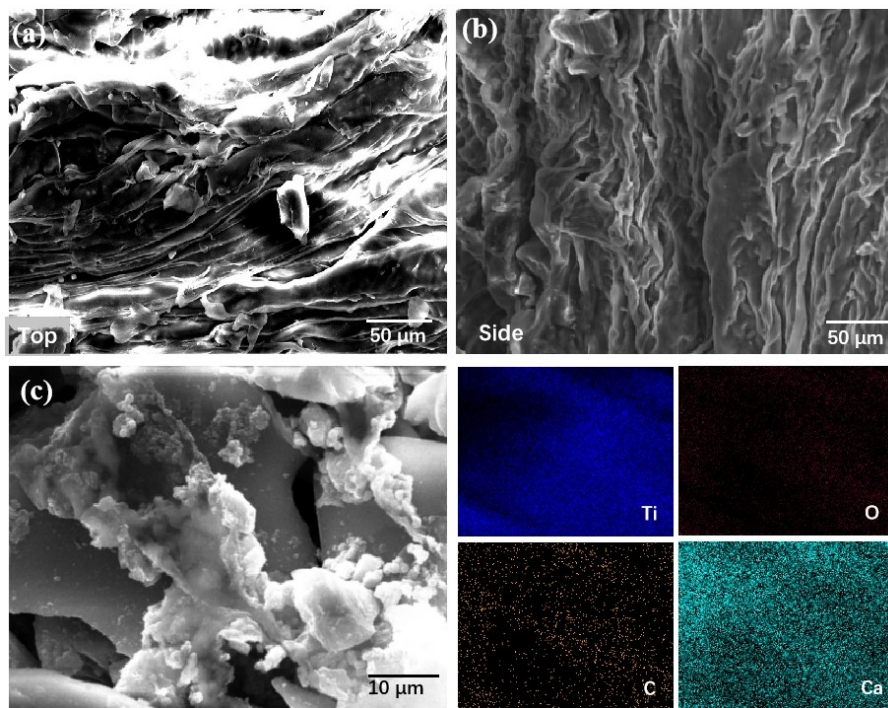

Fig. S29 FE-SEM image of TiOC@SA-TiOC aerogels (a) the top view image, (b) cross-sectional view, and (c) EDS mapping.

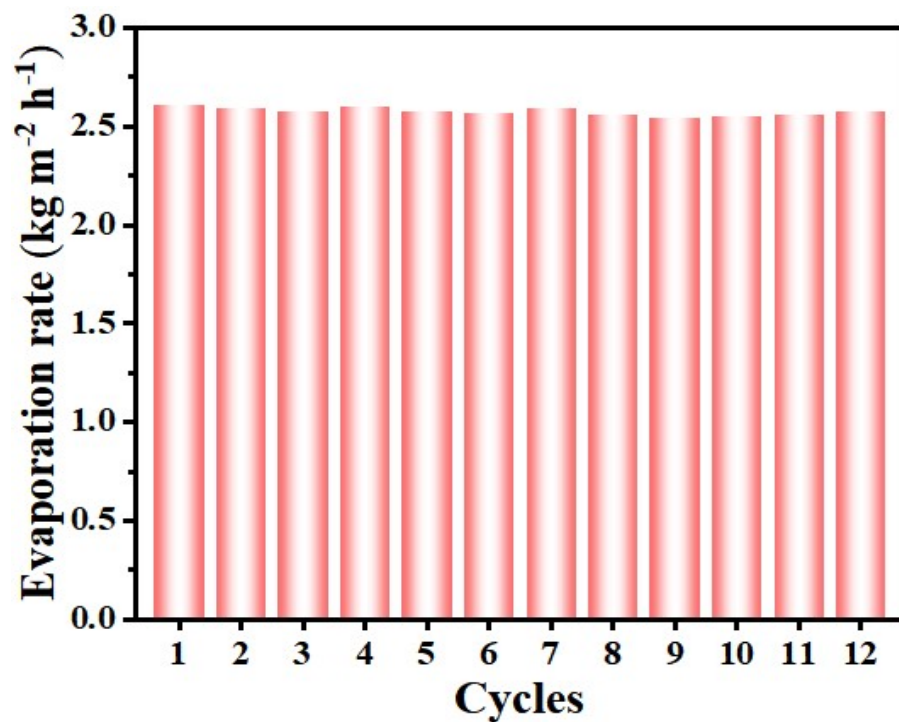

Fig. S30 Cycling stability of the TiOC@SA-TiOC evaporator.

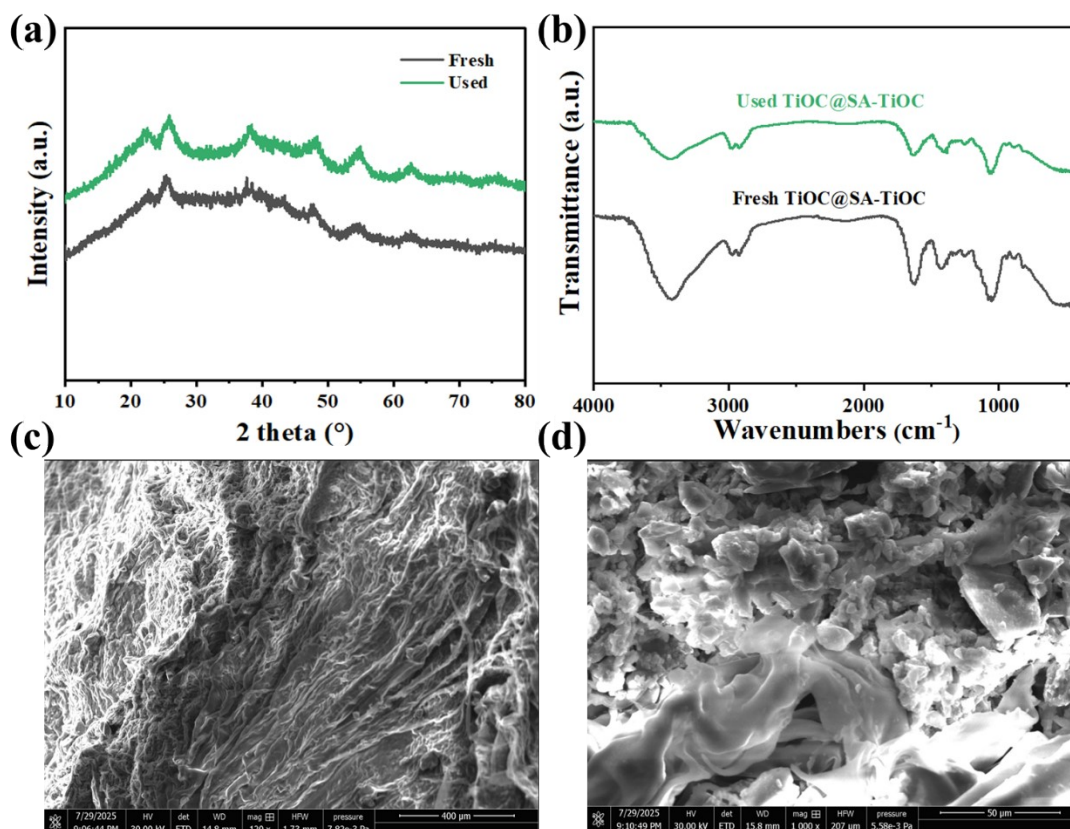

Fig. S31 Surface and morphology stability of the TiOC@SA-TiOC evaporator. (a) XRD patterns, (b) FTIR spectra, and (c,d) SEM after evaporation test.

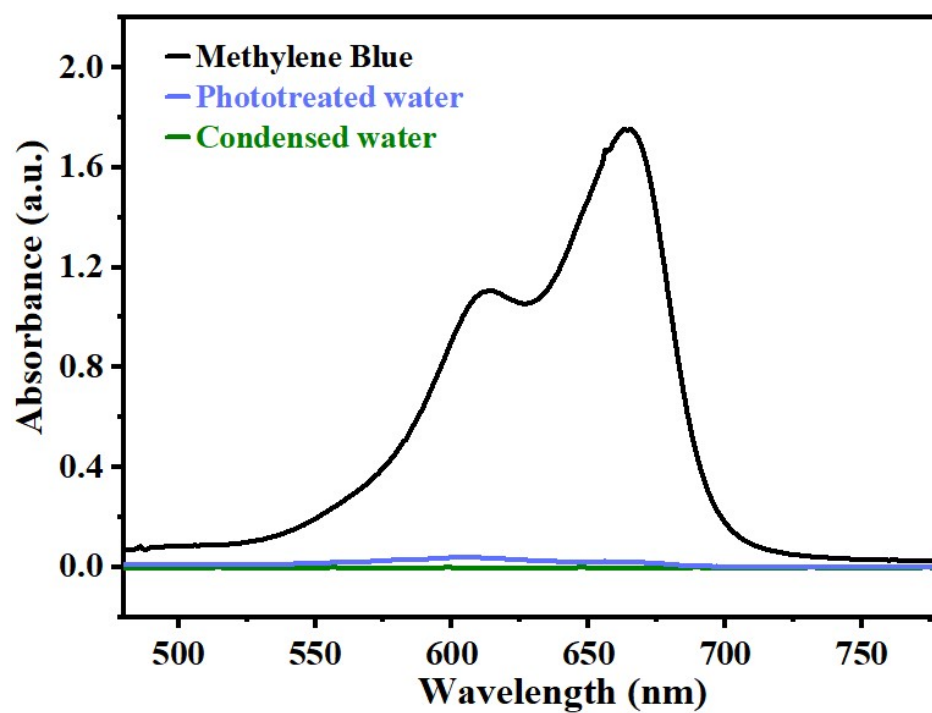

Fig. S32 TiOC@SA-TiOC evaporator for water samples taken during solar powered water

purification and MB degradation.

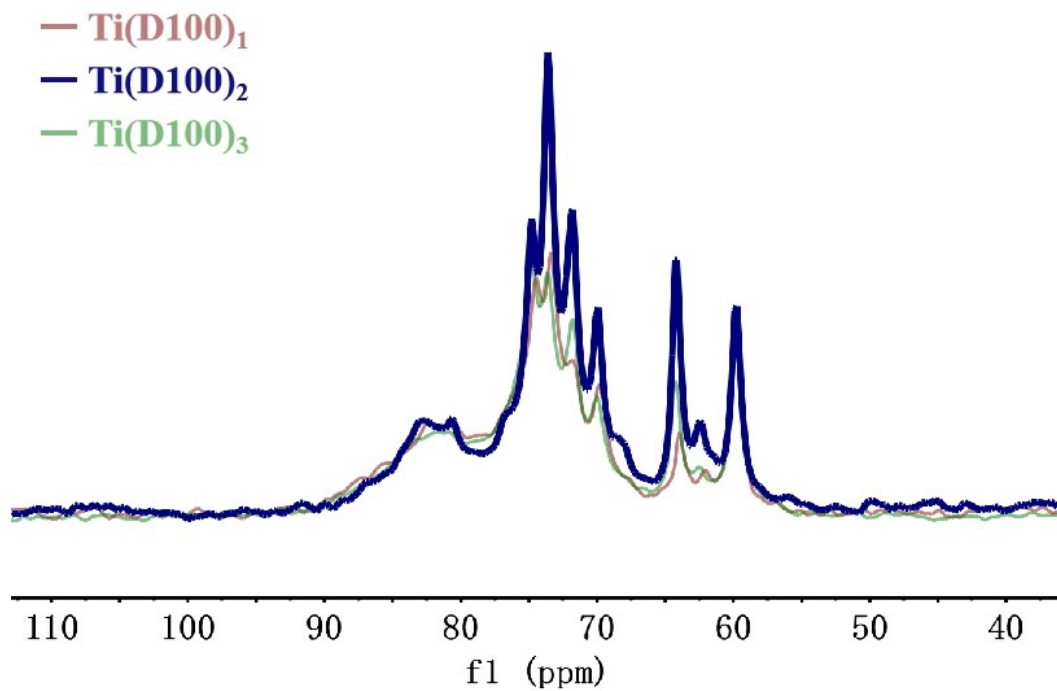

Fig. S33 Solid-state CP/MAS  $^{13}\text{C}$  NMR spectra of  $\text{Ti(D100)}_n$ .

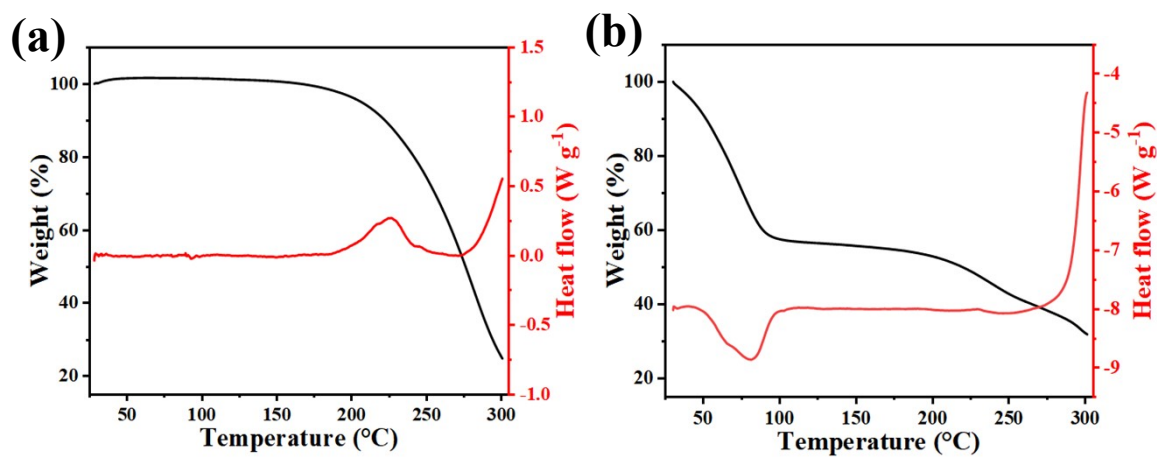

Fig. S34 The DTG-DSC curves of (a)  $\text{D100}$  and (b)  $\text{Ti(D100)}_2$ .

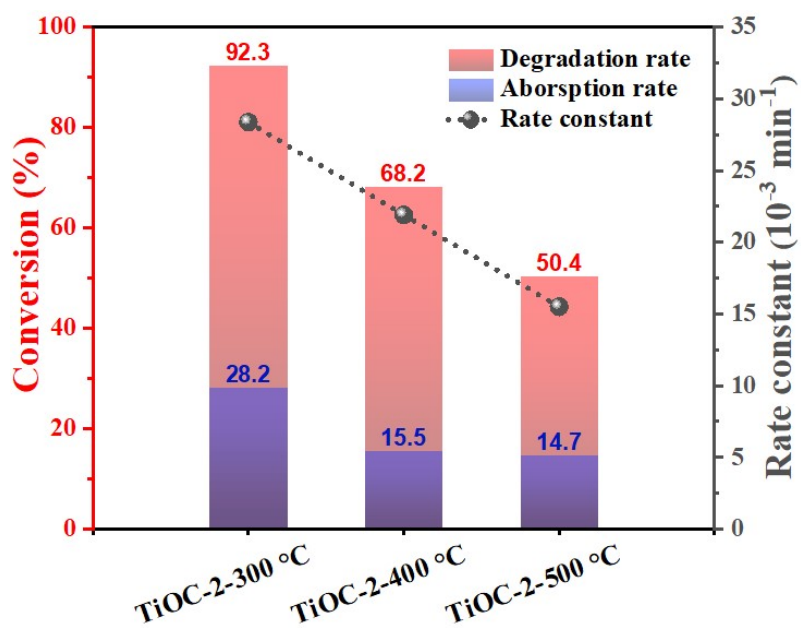

**Fig. S35** Photocatalytic MB degradation performance of TiOC-2-300 °C, TiOC-2-400 °C and TiOC-2-500 °C.

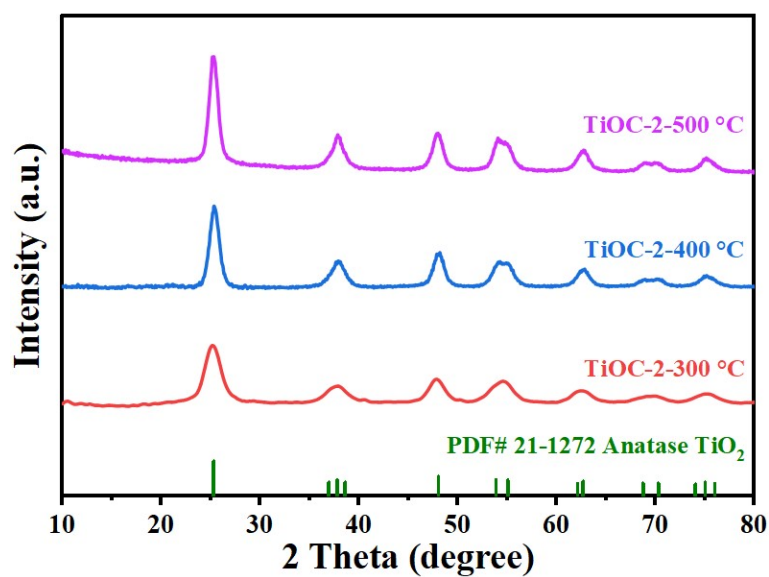

**Fig. S36** XRD patterns of TiOC-2-300 °C, TiOC-2-400 °C and TiOC-2-500 °C.

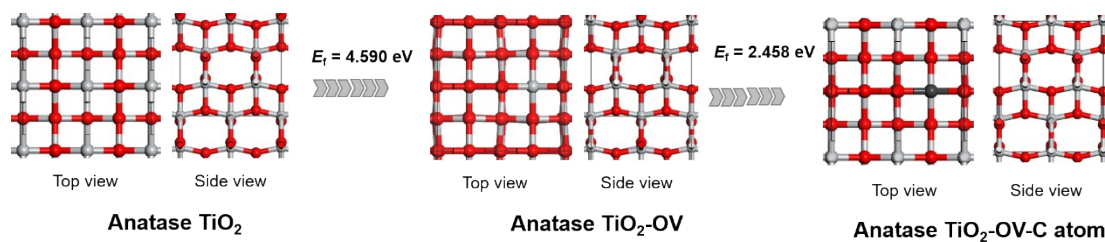

**Fig. S37** Optimized local defect models used for DFT formation-energy calculations in bulk-like anatase TiO<sub>2</sub>: pristine (TiO<sub>2</sub>)<sub>16</sub>, intrinsic OV (TiO<sub>2</sub>)<sub>16</sub>-O<sub>v</sub>, isolated C-substituted model.

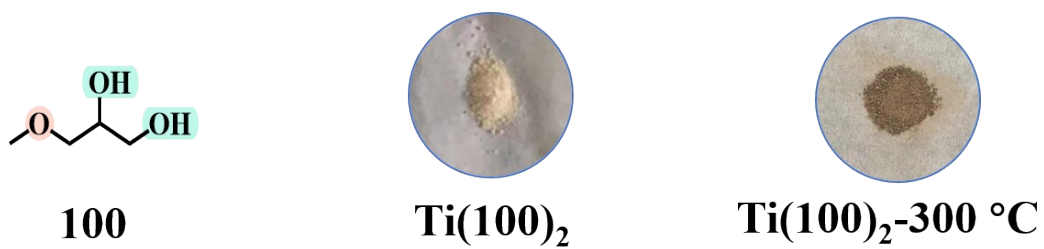

**Fig. S38** Digital photographs of Ti(100)<sub>2</sub> and Ti(100)<sub>2</sub>-300 °C.

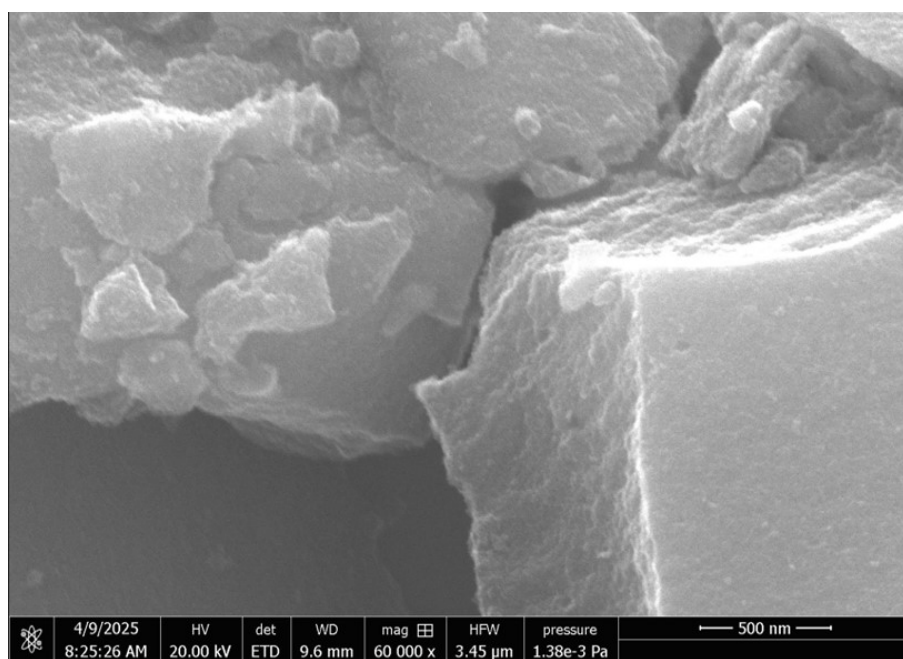

**Fig. S39** FE-SEM image of Ti(100)<sub>2</sub>-300 °C.

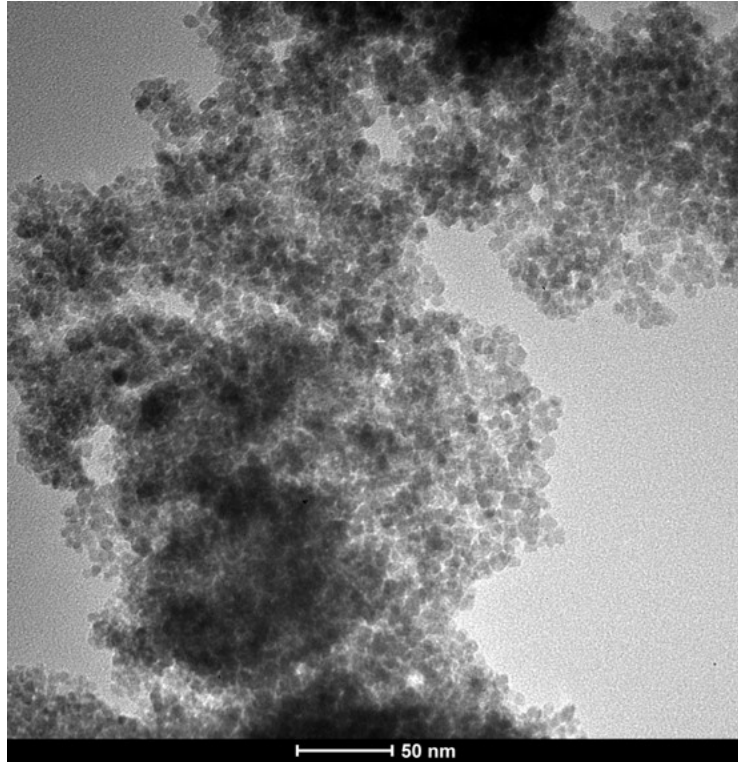

Fig. S40 TEM image of  $\text{Ti}(100)_2$ -300 °C.

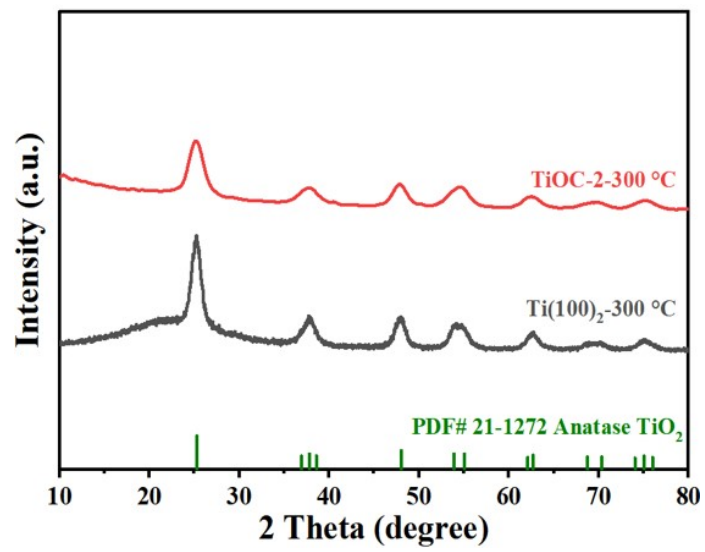

Fig. S41 XRD patterns of  $\text{TiOC-2-300 } ^\circ\text{C}$  and  $\text{Ti}(100)_2$ -300 °C.

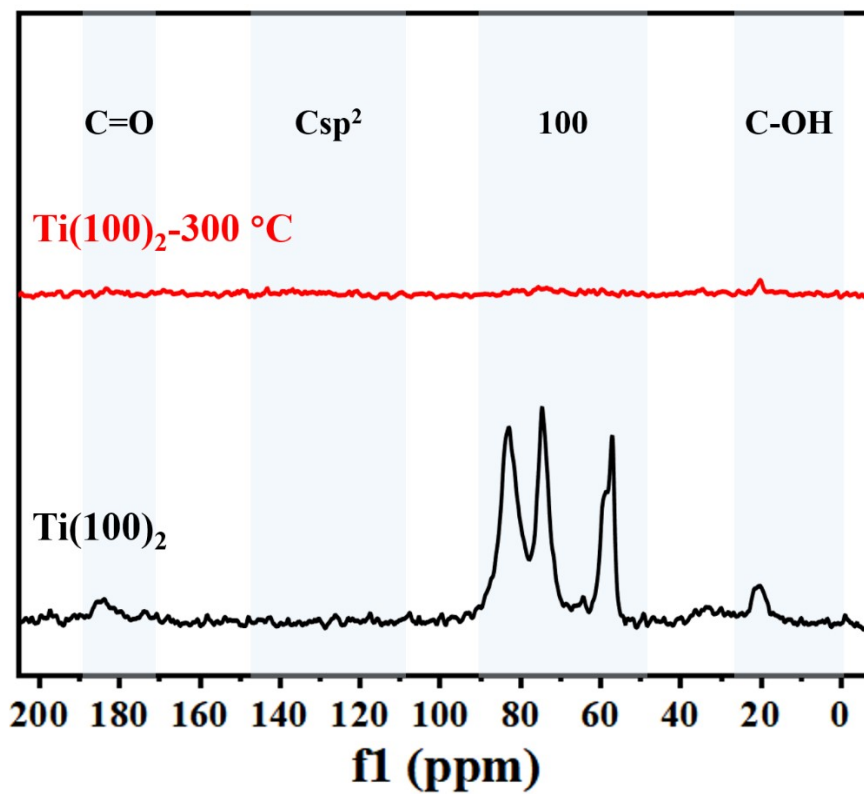

Fig. S42 Solid-state CP/MAS  $^{13}\text{C}$  NMR spectra of  $\text{Ti}(100)_2$  and  $\text{Ti}(100)_2\text{-}300\text{ }^\circ\text{C}$ .

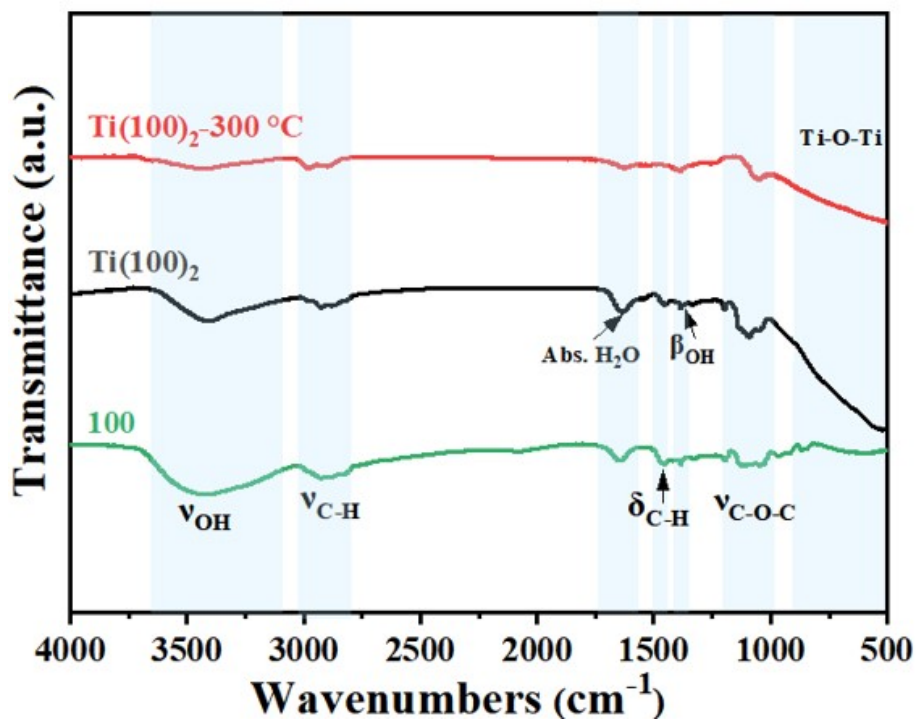

Fig. S43 FTIR spectra of **100**,  $\text{Ti}(100)_2$  and  $\text{Ti}(100)_2\text{-}300\text{ }^\circ\text{C}$ .

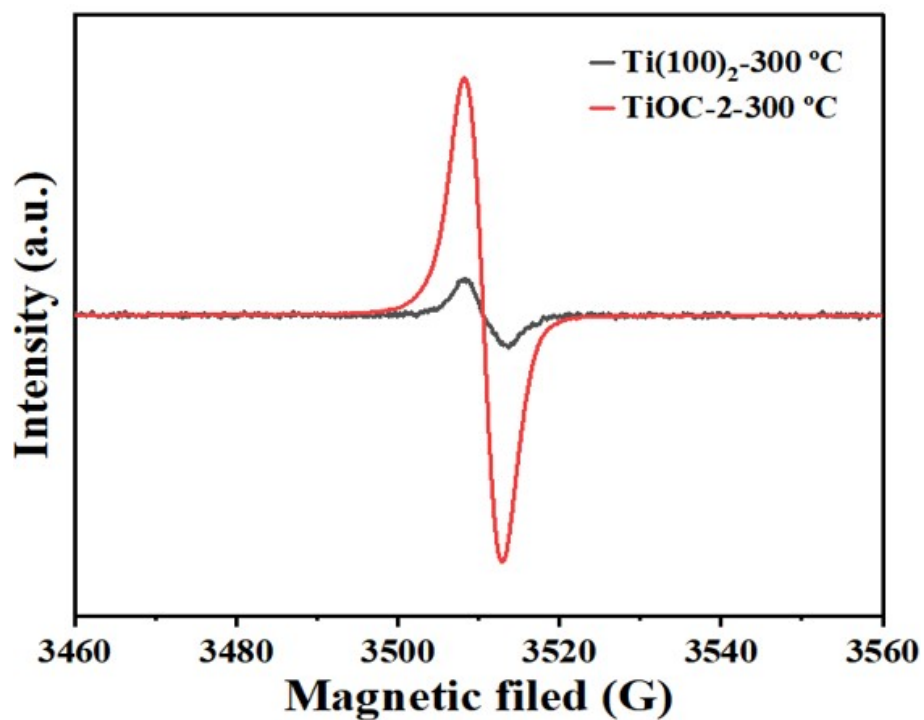

Fig. S44 EPR spectra of  $\text{Ti}(100)_2\text{-}300\text{ }^\circ\text{C}$  and  $\text{TiOC-}2\text{-}300\text{ }^\circ\text{C}$ .

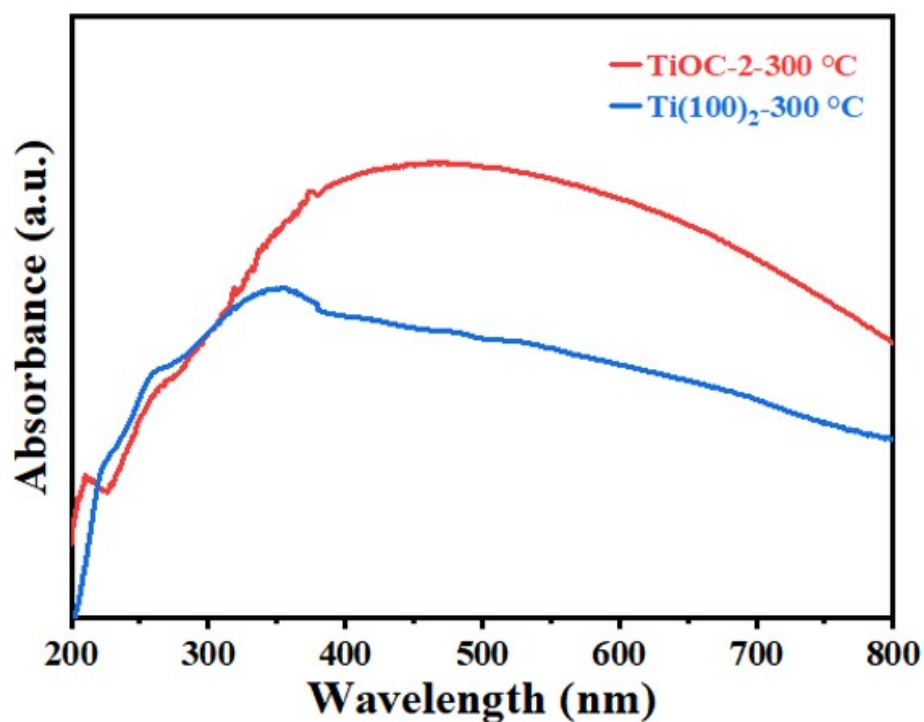

Fig. S45 UV-vis-NIR DRS absorption spectra of  $\text{Ti}(100)_2\text{-}300\text{ }^\circ\text{C}$  and  $\text{TiOC-}2\text{-}300\text{ }^\circ\text{C}$ .

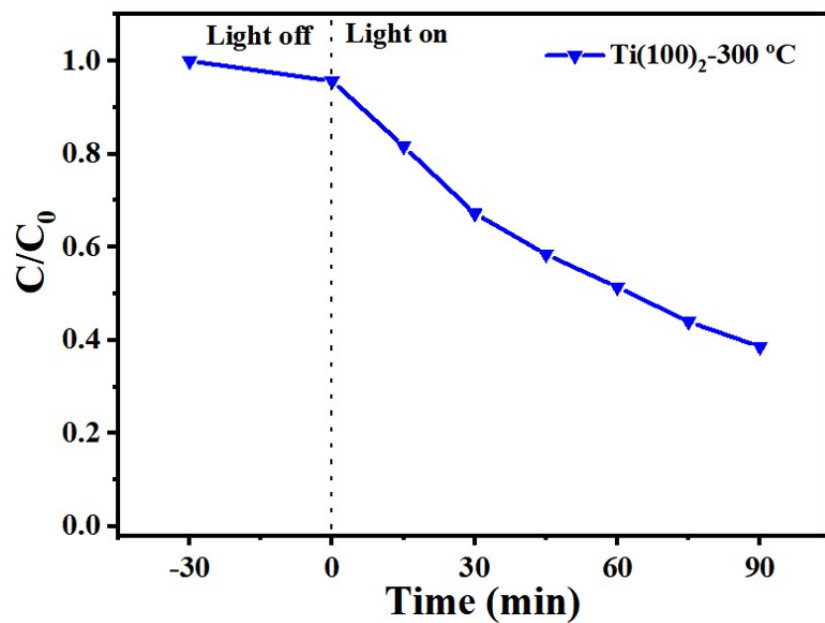

Fig. S46 Photocatalytic MB degradation performance of  $Ti(100)_2-300\text{ }^\circ\text{C}$ .

**Table S1** BET and surface area-normalized rate constant results

| Sample | $A_S$<br>$\text{m}^2 \text{g}^{-1}$ | Average pore volume<br>$\text{cm}^3 \text{g}^{-1}$ | Average pore diameter<br>nm | $k_a$<br>$*10^{-5} \text{g m}^{-2} \text{min}^{-1}$ |
|--------|-------------------------------------|----------------------------------------------------|-----------------------------|-----------------------------------------------------|
| TiOC-0 | 179.04                              | 0.45                                               | 6.67                        | 4.40                                                |
| TiOC-1 | 263.21                              | 0.25                                               | 3.52                        | 6.48                                                |
| TiOC-2 | 267.31                              | 0.21                                               | 3.29                        | 10.61                                               |
| TiOC-3 | 258.47                              | 0.19                                               | 3.15                        | 5.05                                                |

**Table S2.** Intensity ratio calculated from high-resolution XPS spectra.

|        | $O_{\text{latt}}$ | $O_{\text{ads}}$ | O-H <sub>2</sub> O | $O_{\text{ads}}/(O_{\text{latt}}+O\text{-H}_2\text{O})$ | Ti <sup>3+</sup> / Ti <sup>4+</sup> |
|--------|-------------------|------------------|--------------------|---------------------------------------------------------|-------------------------------------|
| TiOC-0 | 82.3%             | 13.9%            | 3.8%               | 16.1%                                                   | 0                                   |
| TiOC-1 | 61.3%             | 28.2%            | 10.5%              | 39.3%                                                   | 20.8                                |
| TiOC-2 | 54.9%             | 34.5%            | 10.6%              | 52.7%                                                   | 35.0                                |
| TiOC-3 | 56.8%             | 32.3%            | 10.9%              | 47.7%                                                   | 24.4                                |

**Table S3** Calculated TPRL parameters of TiOC.

| Samples | $\tau_1$ (ns) <sup>a</sup> | $\tau_2$ (ns) <sup>a</sup> | $I_1$ (%) <sup>b</sup> | $I_2$ (%) <sup>b</sup> | $I_1/I_2$ |
|---------|----------------------------|----------------------------|------------------------|------------------------|-----------|
| TiOC-0  | 0.925±0.023                | 6.536±0.103                | 19.85                  | 80.15                  | 0.25      |
| TiOC-1  | 1.278±0.039                | 7.286±0.132                | 18.15                  | 81.82                  | 0.22      |
| TiOC-2  | 1.633±0.042                | 6.775±0.171                | 36.11                  | 63.89                  | 0.57      |
| TiOC-3  | 1.170±0.079                | 4.690±0.317                | 31.67                  | 68.33                  | 0.46      |

<sup>a</sup> Two distinct lifetime components  $\tau_1$  and  $\tau_2$  calculated by a biexponential function of time (t),

$$F(t) = A_1 e^{-\frac{t}{\tau_1}} + A_2 e^{-\frac{t}{\tau_2}} + y_0,$$

<sup>b</sup> The relative intensities of different lifetime components.

**Table S4** Comparison of TiO<sub>2</sub> based solar evaporators under 1 sun simulated light.

| Evaporators                                             | Evaporation rate<br>(kg m <sup>-2</sup> h <sup>-1</sup> ) | Energy efficiency<br>(%) | C <sub>MB</sub><br>(ppm) | Time<br>(h) | Photocatalytic performance<br>(%) | Ref.             |
|---------------------------------------------------------|-----------------------------------------------------------|--------------------------|--------------------------|-------------|-----------------------------------|------------------|
| Defective Black TiO <sub>2</sub> film <sup>1</sup>      | 1.624                                                     | 85                       | -                        | -           | -                                 | 11               |
| Black TiO <sub>2</sub> nanocages film <sup>1</sup>      | 1.13                                                      | 70.9                     | -                        | -           | -                                 | 12               |
| CDs/TiO <sub>2</sub> nanotube@Ti <sup>1</sup>           | 1.762                                                     | 55.3                     | -                        | -           | -                                 | 13               |
| b-TiO <sub>2</sub> /mesh <sup>2</sup>                   | 0.92                                                      | -                        | -                        | -           | -                                 | 14               |
| Oxygen-deficient TiO <sub>2</sub> ceramics <sup>2</sup> | 2.38                                                      | 81.26                    | -                        | -           | -                                 | 15               |
| Black TiO <sub>2</sub> /PVA <sup>2</sup>                | 2.492                                                     | -                        | -                        | -           | -                                 | 16               |
| PAM/SA/TiO <sub>2</sub> -CQDs/CNTs 3D <sup>2</sup>      | 2.56                                                      | -                        | -                        | 2           | 85.5                              | 17               |
| TiO <sub>2</sub> /SiO <sub>2</sub> @CNMs <sup>2</sup>   | 1.71                                                      | 92.1                     | 10                       | 1.5         | 91.3                              | 18               |
| CNTs/TiO <sub>2</sub> /Ag SWDIES <sup>2</sup>           | 1.46                                                      | -                        | 10                       | 4           | 87                                | 19               |
| TiO <sub>2</sub> @CB/CF <sup>2</sup>                    | 1.42                                                      | 90.4                     | 5                        | 2           | 57                                | 20               |
| TiOC@SA-TiOC <sup>2</sup>                               | 2.61                                                      | 92.19                    | 10                       | 3           | <b>91.2</b>                       | <b>This work</b> |

<sup>1</sup> Calculate the photothermal efficiency according to formula  $\eta = \dot{m} \cdot H_e / Q_s$ , where  $H_e$  is fixed at the bulk water phase-change enthalpy (2256–2260 J g<sup>-1</sup>). This overestimates  $h_{lv}$  and results in artificially high efficiency values.

<sup>2</sup> Calculate the photothermal efficiency according to formula  $\eta = \dot{m} h_{lv} / C_{opt} P_0$ , where  $h_{lv}$  is calibrated to match the system's actual evaporation enthalpy, producing efficiency values that reflect the real photothermal performance of the reactor.

**Table S5.** Intensity ratio calculated from high-resolution *in-situ* XPS spectra.

|                   | O <sub>latt</sub> | O <sub>ads</sub> | O-H <sub>2</sub> O | O <sub>ads</sub> /(O <sub>latt</sub> +O-H <sub>2</sub> O) | Ti <sup>3+</sup> / Ti <sup>4+</sup> |
|-------------------|-------------------|------------------|--------------------|-----------------------------------------------------------|-------------------------------------|
| TiOC-2/300 °C-1 h | 70.6              | 15.8             | 13.6               | 18.8                                                      | 44.9                                |
| TiOC-2/300 °C-2 h | 72.8              | 21.1             | 6.1                | 26.8                                                      | 35.6                                |
| TiOC-2/400 °C-1 h | 85.5              | 9.8              | 4.7                | 10.9                                                      | 8.1                                 |
| TiOC-2/500 °C-1 h | 77.0              | 9.3              | 12.8               | 10.2                                                      | 0                                   |

**Table S6** Formation energy ( $E_f$ ) for each optimized local defect models as a function of total energy of pristine  $(\text{TiO}_2)_{16}$ , intrinsic OV  $(\text{TiO}_2)_{16}-\text{O}_v$ , isolated C-substituted model, and aromatic  $\text{C}_{sp^2}$ -associated OV-containing model.

| Structure                                                | Energy (eV)                                         |                                                |                                                                       |                                                             |
|----------------------------------------------------------|-----------------------------------------------------|------------------------------------------------|-----------------------------------------------------------------------|-------------------------------------------------------------|
|                                                          | $E_{[(\text{TiO}_2)_{16}]}$                         | $\mu_{\text{O}}$                               | $E_{[(\text{TiO}_2)_{16}-\text{O}_v]}$                                | $E_f^{\text{O}_v}$                                          |
| $\text{TiO}_2-\text{O}_v$                                | -397.453                                            | -4.930                                         | -387.933                                                              | 4.590                                                       |
| $\text{TiO}_2-\text{C}$                                  | $E_{[(\text{TiO}_2)_{16}-\text{O}_v]}$<br>-387.933  | $\mu_{\text{C}}$<br>-8.390                     | $E_{[\text{C}-(\text{TiO}_2)_{16}]}$<br>-393.865                      | $E_f^{\text{C@O}_v}$<br>2.458                               |
| $\text{TiO}_2-3\text{O}_v-\text{C}_{10}/\text{C}_{sp^2}$ | $E_{[(\text{TiO}_2)_{16}-3\text{O}_v]}$<br>-367.815 | $E_{\text{C}_{10}/\text{C}_{sp^2}}$<br>-75.326 | $E_{[\text{C}_{10}/\text{C}_{sp^2}-(\text{TiO}_2)_{16}]}$<br>-445.967 | $E_f^{\text{C}_{10}/\text{C}_{sp^2}@3\text{O}_v}$<br>-2.826 |

## References

- 1 T. Zhang, Y. Lv, P. Cao, Z. Song, Q. Wang, Y. Guo, L. Hong, Y. Chen, Vine utilization strategy: biomass-based aerogel with vertically aligned channels for highly efficient interfacial solar evaporation. *Chem. Eng. J.*, 2025, **515**, 163828.
- 2 J.-W. Wang, X. Bao, M. Yuan, C. Zhu, L. Zhu, Chen, S. Easy access to robust rigid SiO<sub>2</sub>-based photothermal aerogel for enhanced solar interfacial evaporation. *Sep. Purif. Technol.*, 2025, **353**, 128324.
- 3 G. Kresse, J. Furthmüller, Efficient iterative schemes for *ab initio* total-energy calculations using a plane-wave basis set. *Phys. Rev. B*, 1996, 11169-11186.
- 4 I. I. Solovyev, P. H. Dederichs, V. V. Anisimov, Corrected atomic limit in the local-density approximation and the electronic structure of d impurities in Rb. *Phys. Rev. B*, 1994, **50**, 16861-16871.
- 5 J.K. Nørskov, J. Rossmeisl, A. Logadottir, Origin of the overpotential for oxygen reduction at a fuel-cell cathode. *J. Phys. Chem. B*, 2004, **108**, 17886-17892.
- 6 S. Grimme, J. Antony, S. Ehrlich, H. Krieg, A consistent and accurate ab initio parametrization of density functional dispersion correction (DFT-D) for the 94 elements H-Pu. *J. Chem. Phys.*, 2010, **132**, 154104.
- 7 S. Cong, J. Cai, X. Li, J. You, L. Wang, X. Wang, Direct Z-scheme xylan-based carbon dots@TiO<sub>2-x</sub> nanocomposites for visible light driven photocatalytic of dye degradation and antibacterial. *Adv. Funct. Mater.*, 2024, 2401540.
- 8 S. Yan, Y. Li, F. Xie, J. Wu, X. Jia, J. Yang, H. Song, Z. Zhang, Environmentally safe and porous MS@TiO<sub>2</sub>@PPy monoliths with superior visible-light photocatalytic properties for rapid oil-water separation and water purification. *ACS Sustainable Chem. Eng.*, 2020, **8**, 5347-5359.
- 9 B. Shen, Y. Xia, Y. Zhou, J. Wang, Y. Feng, W. Xu, Synthesis of highly-ordered ternary CeO<sub>2</sub>-AuNR-Cu<sub>2</sub>O Janus structure with dual Schottky junctions for highly efficient photocatalysis. *Sci. China Mater.*, 2025, **68**, 1906-1917.
- 10 M. Zhao, X. Wang, M. Gao, J. Zhang, Y. Lu, Y. Guo, L. Hu, X. Su, J. Feng, Co<sup>3+</sup> in cobalt (100)/g-C<sub>3</sub>N<sub>4</sub> facilitating the conversion of superoxide radicals into hydroxyl radicals and improving photocatalysis. *Appl. Surf. Sci.*, 2025, **706**, 163536.
- 11 P. Zheng, J. Tang, Z. Zhou, L. Gong, H. Yang, X. Jia, X. Li, Y. Liu, L. Tan, Ultrafast Synthesis of Defective Black TiO<sub>2</sub> via One-Step NaN<sub>3</sub> Deflagration for High-efficiency Solar Water Evaporation, *Surf. Interfaces*, 2021, **22**, 100901.
- 12 G. Zhu, J. Xu, W. Zhao, F. Huang, Constructing Black Titania with Unique Nanocage Structure for Solar Desalination, *ACS Appl. Mater. Interfaces*, 2016, **8**, 31716-31721.
- 13 C. Xue, D. Li, Y. Li, N. Li, F. Zhang, Y. Wang, Q. Chang, S. Hu, 3D-carbon dots decorated black TiO<sub>2</sub> nanotube Array@Ti foam with enhanced photothermal and photocatalytic activities, *Ceram. Int.*, 2019, **45**, 17512-17520.
- 14 S. Zhu, Z. Yu, L. Zhang, S. Watanabe, Solution Plasma-Synthesized Black TiO<sub>2</sub> Nanoparticles

- for Solar–Thermal Water Evaporation, *ACS Appl. Nano Mater.*, 2021, **4**, 3940-3948.
- 15 L. Chen, D. Yao, M. Zhu, J. Zhao, Y. Xia, Y.-P. Zeng, Gradient structure oxygen-deficient TiO<sub>2</sub> ceramics for interfacial evaporation by direct ink writing, *Ceram. Int.*, 2025, **51**, 34127-34133.
- 16 X. Zhang, Y. Cui, C. Wang, Oxygen Vacancy-Engineered Black TiO<sub>2</sub>/PVA Hydrogel for High-Efficiency Solar-Driven Interfacial Evaporation, *Processes*, 2026, **14**, 1159.
- 17 G. Liu, Q. Ma, Z. Li, J. Zhang, K. Lei, D. Li, M. Xue, W. Wu, J. Du, X. Zhang, Dual-functional hydrogel evaporator with CQDs loaded TiO<sub>2</sub> and CNTs for efficient eutrophic water body purification, *Desalination*, 2026, 622, 119752.
- 18 W. Wang, Y. Chen, N. Wang, M. Jensen, X. Li, Facile preparation of anatase coated nanofiber mats for multifaceted water treatment, *Chem. Eng. J.*, 2024, **485**, 149764.
- 19 X. Sun, Q. Ye, Y. Xia, X. Ji, Q. Cai, Z. Hu, S. Rao, X. Wu, An easily scalable multi-unit solar/wave-driven interfacial evaporation system connected by a hinge-like structure for co-producing of fresh water and electricity, *Energ. Convers. Manage*, 2024, **322**, 119189.
- 20 Y. Tian, X. Yang, L. Xu, X. Wang, J. Yu, D. Wu, F. Li, T. Gao, A composite fabric with dual functions for high-performance water purification, *Materials*, 2022, **15**, 5917.
